# Supplementary material for: Exploring the potential mechanism of emetine against coronavirus disease 2019 combined with lung adenocarcinoma: bioinformatics and molecular simulation analyses
Source: BMC Cancer. 2022 Jun 22;22:687. doi: 10.1186/s12885-022-09763-2 (PMC9214478; doi:10.1186/s12885-022-09763-2)
Supplement: Supplementary file 1 — Additional file 1. Genes related to COVID-19. [file 12885_2022_9763_MOESM1_ESM.xls]

## Sheet: Sheet1
Genes related to COVID-19
Gene symbol	Source
ABO	NCBI-Gene
ACE	NCBI-Gene
ACE2	NCBI-Gene
ADAM17	NCBI-Gene
ADAMTS13	NCBI-Gene
ADIPOQ	NCBI-Gene
ADM	NCBI-Gene
AGER	NCBI-Gene
AGT	NCBI-Gene
AGTR2	NCBI-Gene
AKT1	NCBI-Gene
ALB	NCBI-Gene
ALOX5	NCBI-Gene
ANGPT2	NCBI-Gene
ANXA2	NCBI-Gene
AP3B1	NCBI-Gene
APOE	NCBI-Gene
APOL1	NCBI-Gene
AR	NCBI-Gene
ARNTL	NCBI-Gene
ATF4	NCBI-Gene
AVP	NCBI-Gene
BCL2	NCBI-Gene
BECN1	NCBI-Gene
BSG	NCBI-Gene
BTK	NCBI-Gene
C5	NCBI-Gene
C5AR1	NCBI-Gene
C9orf72	NCBI-Gene
CALCA	NCBI-Gene
CAT	NCBI-Gene
CCL17	NCBI-Gene
CCL2	NCBI-Gene
CCL20	NCBI-Gene
CCL3	NCBI-Gene
CCL4	NCBI-Gene
CCL7	NCBI-Gene
CCR1	NCBI-Gene
CCR5	NCBI-Gene
CCR6	NCBI-Gene
CCR9	NCBI-Gene
CD14	NCBI-Gene
CD163	NCBI-Gene
CD4	NCBI-Gene
CD8A	NCBI-Gene
CD99	NCBI-Gene
CHI3L1	NCBI-Gene
CHRFAM7A	NCBI-Gene
CLEC4M	NCBI-Gene
CNR2	NCBI-Gene
CPA3	NCBI-Gene
CRP	NCBI-Gene
CSF2	NCBI-Gene
CST3	NCBI-Gene
CTSL	NCBI-Gene
CXCL10	NCBI-Gene
CXCL8	NCBI-Gene
CXCR6	NCBI-Gene
DEFA1	NCBI-Gene
DPP4	NCBI-Gene
EDN1	NCBI-Gene
EGFR	NCBI-Gene
ELANE	NCBI-Gene
ELAVL2	NCBI-Gene
ENPEP	NCBI-Gene
ENPP2	NCBI-Gene
EPO	NCBI-Gene
ERG	NCBI-Gene
ERVFRD-1	NCBI-Gene
ERVW-1	NCBI-Gene
ESM1	NCBI-Gene
F2	NCBI-Gene
F3	NCBI-Gene
FABP2	NCBI-Gene
FAS	NCBI-Gene
FASN	NCBI-Gene
FCGR1A	NCBI-Gene
FCGR3A	NCBI-Gene
FLT1	NCBI-Gene
FNDC5	NCBI-Gene
FPR1	NCBI-Gene
FTL	NCBI-Gene
FURIN	NCBI-Gene
G6PD	NCBI-Gene
GC	NCBI-Gene
GDF15	NCBI-Gene
GSTM1	NCBI-Gene
GSTT1	NCBI-Gene
GZMA	NCBI-Gene
HAVCR2	NCBI-Gene
HIF1A	NCBI-Gene
HLA-A	NCBI-Gene
HLA-B	NCBI-Gene
HLA-C	NCBI-Gene
HLA-DRB1	NCBI-Gene
HLA-G	NCBI-Gene
HMGB1	NCBI-Gene
HMOX1	NCBI-Gene
HSPA5	NCBI-Gene
IFIH1	NCBI-Gene
IFITM3	NCBI-Gene
IFNA1	NCBI-Gene
IFNA2	NCBI-Gene
IFNAR2	NCBI-Gene
IFNB1	NCBI-Gene
IFNG	NCBI-Gene
IFNL1	NCBI-Gene
IFNL2	NCBI-Gene
IFNL4	NCBI-Gene
IL10	NCBI-Gene
IL10RB	NCBI-Gene
IL13	NCBI-Gene
IL17A	NCBI-Gene
IL18	NCBI-Gene
IL1B	NCBI-Gene
IL2	NCBI-Gene
IL2RA	NCBI-Gene
IL33	NCBI-Gene
IL37	NCBI-Gene
IL4	NCBI-Gene
IL6	NCBI-Gene
IL6R	NCBI-Gene
IL7	NCBI-Gene
ITGAV	NCBI-Gene
ITK	NCBI-Gene
JAK1	NCBI-Gene
KLF2	NCBI-Gene
KLRC2	NCBI-Gene
KNG1	NCBI-Gene
LAG3	NCBI-Gene
LCN2	NCBI-Gene
LDHA	NCBI-Gene
LEP	NCBI-Gene
LGALS3	NCBI-Gene
LGALS9	NCBI-Gene
LOC106699567	NCBI-Gene
LOC111832671	NCBI-Gene
LOC112590816	NCBI-Gene
LOC112590817	NCBI-Gene
LOC112679198	NCBI-Gene
LOC116158494	NCBI-Gene
LOC116158495	NCBI-Gene
LOC116183086	NCBI-Gene
LOC116183087	NCBI-Gene
LOC117134593	NCBI-Gene
LOC117134604	NCBI-Gene
LOC117134605	NCBI-Gene
LOC117134606	NCBI-Gene
LOC117134607	NCBI-Gene
LOC117134608	NCBI-Gene
LOC117134611	NCBI-Gene
LOC117135104	NCBI-Gene
LOC117135105	NCBI-Gene
LOC117135106	NCBI-Gene
LOC117152610	NCBI-Gene
LOC117152611	NCBI-Gene
LOC117204000	NCBI-Gene
LOC117204001	NCBI-Gene
LOC117600004	NCBI-Gene
LOC117693187	NCBI-Gene
LOC118966792	NCBI-Gene
LOC119086083	NCBI-Gene
LOC119230225	NCBI-Gene
LOC119266102	NCBI-Gene
LPA	NCBI-Gene
LZTFL1	NCBI-Gene
MAF	NCBI-Gene
MAFB	NCBI-Gene
MALAT1	NCBI-Gene
MAS1	NCBI-Gene
MB	NCBI-Gene
MBL2	NCBI-Gene
MIF	NCBI-Gene
MIR10B	NCBI-Gene
MIR1207	NCBI-Gene
MIR126	NCBI-Gene
MIR146A	NCBI-Gene
MIR29A	NCBI-Gene
MIR31	NCBI-Gene
MIR320A	NCBI-Gene
MIR320B1	NCBI-Gene
MIR320C1	NCBI-Gene
MIR451A	NCBI-Gene
MMP1	NCBI-Gene
MMP3	NCBI-Gene
MPO	NCBI-Gene
MTHFR	NCBI-Gene
MTOR	NCBI-Gene
MUC1	NCBI-Gene
MUC5AC	NCBI-Gene
NCAM1	NCBI-Gene
NEAT1	NCBI-Gene
NEWENTRY	NCBI-Gene
NFE2L2	NCBI-Gene
NLRP3	NCBI-Gene
NOS3	NCBI-Gene
NPPB	NCBI-Gene
NRP1	NCBI-Gene
NRP2	NCBI-Gene
OAS1	NCBI-Gene
OLR1	NCBI-Gene
P2RX7	NCBI-Gene
P2RY14	NCBI-Gene
PAFAH1B1	NCBI-Gene
PARP14	NCBI-Gene
PF4	NCBI-Gene
PLA2G2A	NCBI-Gene
PLA2G7	NCBI-Gene
PLAUR	NCBI-Gene
PLG	NCBI-Gene
PNPLA3	NCBI-Gene
PRF1	NCBI-Gene
PTGDR2	NCBI-Gene
PTX3	NCBI-Gene
RBM15	NCBI-Gene
REN	NCBI-Gene
RIOX2	NCBI-Gene
S100A12	NCBI-Gene
S100A8	NCBI-Gene
S100A9	NCBI-Gene
SAA1	NCBI-Gene
SDC1	NCBI-Gene
SDCBP	NCBI-Gene
SELL	NCBI-Gene
SELP	NCBI-Gene
SERPINA1	NCBI-Gene
SERPINC1	NCBI-Gene
SERPING1	NCBI-Gene
SFTPB	NCBI-Gene
SFTPD	NCBI-Gene
SIGLEC1	NCBI-Gene
SIGMAR1	NCBI-Gene
SIRT3	NCBI-Gene
SLC6A19	NCBI-Gene
SLC6A20	NCBI-Gene
SLC6A4	NCBI-Gene
SLCO4C1	NCBI-Gene
SMN1	NCBI-Gene
SNHG16	NCBI-Gene
SNHG6	NCBI-Gene
SOCS1	NCBI-Gene
SOCS3	NCBI-Gene
SOD3	NCBI-Gene
SPP1	NCBI-Gene
SREBF2	NCBI-Gene
STAT1	NCBI-Gene
STAT3	NCBI-Gene
STING1	NCBI-Gene
TAS2R1	NCBI-Gene
TAS2R38	NCBI-Gene
TEK	NCBI-Gene
TGFB1	NCBI-Gene
TH2-LCR	NCBI-Gene
THBS3	NCBI-Gene
THPO	NCBI-Gene
TLR3	NCBI-Gene
TLR4	NCBI-Gene
TLR7	NCBI-Gene
TMPRSS2	NCBI-Gene
TNF	NCBI-Gene
TNFRSF13C	NCBI-Gene
TNFRSF1B	NCBI-Gene
TNFSF14	NCBI-Gene
TNNI1	NCBI-Gene
TNNI3	NCBI-Gene
TNNT2	NCBI-Gene
TREM1	NCBI-Gene
TREM2	NCBI-Gene
TRPA1	NCBI-Gene
TRPV1	NCBI-Gene
TTR	NCBI-Gene
UBE2L6	NCBI-Gene
UNC13D	NCBI-Gene
VDR	NCBI-Gene
VKORC1	NCBI-Gene
VWF	NCBI-Gene
ZC3HAV1	NCBI-Gene
INS	GeneCards
TAMM41	GeneCards
PMS2	GeneCards
CHAT	GeneCards
CLCN6	GeneCards
MTM1	GeneCards
INPP5E	GeneCards
TNFRSF1A	GeneCards
IRF3	GeneCards
TBK1	GeneCards
FYCO1	GeneCards
IRF7	GeneCards
CD209	GeneCards
AAK1	GeneCards
OAS3	GeneCards
XCR1	GeneCards
VPS39	GeneCards
PDCD1	GeneCards
IFNAR1	GeneCards
GPT	GeneCards
IL1A	GeneCards
CXCL1	GeneCards
CXCL2	GeneCards
NEU1	GeneCards
F11	GeneCards
VAMP8	GeneCards
ICAM1	GeneCards
SCGB1A1	GeneCards
RAB7A	GeneCards
VPS41	GeneCards
DDX58	GeneCards
SNAP29	GeneCards
STX17	GeneCards
AKAP8L	GeneCards
RAB8A	GeneCards
AHR	GeneCards
CCL5	GeneCards
CCR3	GeneCards
IRF2	GeneCards
SURF1	GeneCards
DNMT1	GeneCards
BRD4	GeneCards
AKAP8	GeneCards
RPL36	GeneCards
FBXL12	GeneCards
TIMM29	GeneCards
OAS2	GeneCards
AXL	GeneCards
EIF2B1	GeneCards
TLR2	GeneCards
SLC6A15	GeneCards
DOCK6	GeneCards
KDELR1	GeneCards
NEDD1	GeneCards
TTC27	GeneCards
MAVS	GeneCards
TICAM1	GeneCards
RB1CC1	GeneCards
STX6	GeneCards
STX7	GeneCards
VPS16	GeneCards
VPS18	GeneCards
MADCAM1	GeneCards
TMPRSS4	GeneCards
ISG15	GeneCards
PSME3	GeneCards
PALS1	GeneCards
MDM2	GeneCards
GPHN	GeneCards
HSD17B4	GeneCards
TCF3	GeneCards
ACAD9	GeneCards
MYO1E	GeneCards
TPM4	GeneCards
LRRFIP2	GeneCards
CCHCR1	GeneCards
EIF3G	GeneCards
DHX37	GeneCards
QTRT1	GeneCards
COPG1	GeneCards
SURF6	GeneCards
SLC35F1	GeneCards
MON2	GeneCards
VEGFA	GeneCards
ULK1	GeneCards
ATG13	GeneCards
PLAU	GeneCards
PDHX	GeneCards
HMGCR	GeneCards
NRG1	GeneCards
OSMR	GeneCards
PTPRS	GeneCards
CYB5A	GeneCards
ATP6V0A2	GeneCards
SGCE	GeneCards
PEG10	GeneCards
PSMD11	GeneCards
FAT1	GeneCards
POLD3	GeneCards
RNF213	GeneCards
PDS5A	GeneCards
GCNT3	GeneCards
NCAPH2	GeneCards
RMND1	GeneCards
PALM	GeneCards
MLEC	GeneCards
TUT1	GeneCards
TBC1D8	GeneCards
ECHDC3	GeneCards
STEAP1B	GeneCards
BDKRB1	GeneCards
CTLA4	GeneCards
CD274	GeneCards
NPR3	GeneCards
PAPPA	GeneCards
XK	GeneCards
DELEC1	GeneCards
CXCL5	GeneCards
PIK3C3	GeneCards
IDO1	GeneCards
VPS33A	GeneCards
CXCL3	GeneCards
ATG14	GeneCards
OR51E2	GeneCards
H2AC18	GeneCards
ITGB3	GeneCards
LMNB1	GeneCards
CNBP	GeneCards
MCUB	GeneCards
PSMD1	GeneCards
KLRC1	GeneCards
ITGAM	GeneCards
HP	GeneCards
IRF9	GeneCards
IGHMBP2	GeneCards
TRIP4	GeneCards
TK2	GeneCards
PTBP1	GeneCards
UBC	GeneCards
B2M	GeneCards
FGA	GeneCards
CD81	GeneCards
ANXA5	GeneCards
FKRP	GeneCards
TOMM70	GeneCards
G3BP1	GeneCards
G3BP2	GeneCards
DCTN1	GeneCards
CFTR	GeneCards
PIK3C2A	GeneCards
CD40LG	GeneCards
IL5	GeneCards
SFTPC	GeneCards
CCL11	GeneCards
ICOSLG	GeneCards
ANPEP	GeneCards
MMP12	GeneCards
IL17RA	GeneCards
ANO6	GeneCards
GTF2F2	GeneCards
TARS2	GeneCards
RAP1GDS1	GeneCards
REEP5	GeneCards
RAE1	GeneCards
CLCC1	GeneCards
GIGYF2	GeneCards
RAB14	GeneCards
ALG5	GeneCards
GOLGB1	GeneCards
UGGT2	GeneCards
TRIM59	GeneCards
MYD88	GeneCards
SCARB1	GeneCards
ATP6AP1	GeneCards
TLR8	GeneCards
RAF1	GeneCards
TYK2	GeneCards
NTRK3	GeneCards
DBH	GeneCards
GRIN2B	GeneCards
PIK3R1	GeneCards
PTCH1	GeneCards
ACACA	GeneCards
GRIA1	GeneCards
KCNQ2	GeneCards
SMARCA4	GeneCards
BAX	GeneCards
EPHA7	GeneCards
MAPK12	GeneCards
CARD11	GeneCards
GPX4	GeneCards
GRM7	GeneCards
IRS1	GeneCards
SYT1	GeneCards
RFC1	GeneCards
VCL	GeneCards
BMP2	GeneCards
AVPR1A	GeneCards
GRM8	GeneCards
LIFR	GeneCards
GP9	GeneCards
KDM4B	GeneCards
MELK	GeneCards
PSMA6	GeneCards
TCF7L2	GeneCards
SOX5	GeneCards
SLC19A1	GeneCards
XDH	GeneCards
TMPO	GeneCards
UGDH	GeneCards
CPS1	GeneCards
CCR2	GeneCards
EYA1	GeneCards
KISS1R	GeneCards
HRH4	GeneCards
CHKB	GeneCards
MBP	GeneCards
PAK6	GeneCards
TBL1XR1	GeneCards
ROBO1	GeneCards
SALL1	GeneCards
S1PR2	GeneCards
DAB1	GeneCards
ACSL1	GeneCards
LIAS	GeneCards
LAMP2	GeneCards
LMNB2	GeneCards
MTNR1A	GeneCards
MAGI2	GeneCards
NCOR2	GeneCards
PROK2	GeneCards
RPL18	GeneCards
SI	GeneCards
CNDP1	GeneCards
BRDT	GeneCards
HDAC10	GeneCards
ITGA9	GeneCards
PLCE1	GeneCards
KAT6B	GeneCards
MAP2	GeneCards
SH3GL1	GeneCards
RPL13A	GeneCards
SRD5A2	GeneCards
CHST3	GeneCards
ASRGL1	GeneCards
CDH4	GeneCards
DAGLA	GeneCards
ADAMTSL1	GeneCards
GNA12	GeneCards
IQGAP2	GeneCards
KLF15	GeneCards
DPP9	GeneCards
HIP1	GeneCards
GFPT2	GeneCards
IL1RAPL1	GeneCards
NFASC	GeneCards
MYT1L	GeneCards
NBEAL2	GeneCards
NUP107	GeneCards
MLC1	GeneCards
MBD4	GeneCards
POLK	GeneCards
RPL7A	GeneCards
RPL9	GeneCards
SH3GL2	GeneCards
SHANK2	GeneCards
SKP1	GeneCards
SLC30A10	GeneCards
SMOC2	GeneCards
ADD2	GeneCards
ATP6V1D	GeneCards
CDC37	GeneCards
CYTH2	GeneCards
BHMT	GeneCards
BRD1	GeneCards
AS3MT	GeneCards
GPM6A	GeneCards
EDAR	GeneCards
HPSE2	GeneCards
HOMER1	GeneCards
KDM4A	GeneCards
ICAM3	GeneCards
MBD2	GeneCards
PTPRE	GeneCards
PTP4A3	GeneCards
STK26	GeneCards
SIN3B	GeneCards
RBM10	GeneCards
NTM	GeneCards
RFX3	GeneCards
TMPRSS15	GeneCards
ZNF423	GeneCards
CD93	GeneCards
CYP4F11	GeneCards
COX6C	GeneCards
ACYP2	GeneCards
AADAT	GeneCards
ARID3A	GeneCards
CCRL2	GeneCards
GLIS3	GeneCards
GOLPH3	GeneCards
GRIN3B	GeneCards
EFNA2	GeneCards
GALNT13	GeneCards
DPYSL3	GeneCards
DYNLRB2	GeneCards
GAS7	GeneCards
ICAM5	GeneCards
MYH4	GeneCards
LRP1B	GeneCards
LMO3	GeneCards
MARCO	GeneCards
MED25	GeneCards
MTA2	GeneCards
PPP2R3C	GeneCards
PPP2R5E	GeneCards
PRMT6	GeneCards
TUBGCP6	GeneCards
RPS15	GeneCards
RPS11	GeneCards
RYBP	GeneCards
SAFB	GeneCards
PTPRR	GeneCards
SCUBE2	GeneCards
TRA2A	GeneCards
UXS1	GeneCards
VPS13B	GeneCards
ANO3	GeneCards
DLGAP2	GeneCards
ANKLE2	GeneCards
ASIC2	GeneCards
FAM13A	GeneCards
GTF2H3	GeneCards
IQCE	GeneCards
FREM2	GeneCards
ILF3	GeneCards
IMMP2L	GeneCards
MUC2	GeneCards
NUCB1	GeneCards
MYRIP	GeneCards
FRMD7	GeneCards
NELL2	GeneCards
TRAPPC9	GeneCards
SV2C	GeneCards
TCTN2	GeneCards
TRIM44	GeneCards
SACM1L	GeneCards
RBFOX1	GeneCards
CIRBP	GeneCards
ANKRD6	GeneCards
CSMD1	GeneCards
AP3M1	GeneCards
APBA3	GeneCards
ARL4A	GeneCards
CLYBL	GeneCards
BCL2L14	GeneCards
ALG12	GeneCards
DAZAP1	GeneCards
ENPP6	GeneCards
HSD17B14	GeneCards
ICAM4	GeneCards
MYO1F	GeneCards
MYOM2	GeneCards
NAPB	GeneCards
MAL	GeneCards
NDST4	GeneCards
PLCL2	GeneCards
PLXNB2	GeneCards
ST18	GeneCards
WDR19	GeneCards
UNC5D	GeneCards
USP26	GeneCards
RRAGD	GeneCards
RCVRN	GeneCards
PDZD2	GeneCards
SETD1B	GeneCards
RHOF	GeneCards
SNRNP70	GeneCards
POU2AF1	GeneCards
CCL26	GeneCards
DKKL1	GeneCards
AHNAK	GeneCards
BTG4	GeneCards
ASB3	GeneCards
EAPP	GeneCards
FAM126A	GeneCards
FAM177A1	GeneCards
JMY	GeneCards
GATB	GeneCards
KBTBD8	GeneCards
CHRAC1	GeneCards
GUCY2F	GeneCards
IFI44	GeneCards
NEU4	GeneCards
NEURL1	GeneCards
NFKBIZ	GeneCards
NSUN3	GeneCards
NXT1	GeneCards
NAALADL2	GeneCards
MED22	GeneCards
PLEKHA4	GeneCards
TBC1D5	GeneCards
STK32A	GeneCards
STX18	GeneCards
SYT4	GeneCards
TAF5	GeneCards
SPOCK2	GeneCards
UBAC1	GeneCards
SH3BGRL	GeneCards
RASIP1	GeneCards
SAFB2	GeneCards
PPM1H	GeneCards
RNF182	GeneCards
RBMS3	GeneCards
NTPCR	GeneCards
PIH1D1	GeneCards
RAB11FIP4	GeneCards
PTOV1	GeneCards
TMTC1	GeneCards
ZNF699	GeneCards
CHODL	GeneCards
ADGRL4	GeneCards
CABP1	GeneCards
DDX55	GeneCards
ALDH16A1	GeneCards
ERI3	GeneCards
GPR20	GeneCards
GBA3	GeneCards
EMP1	GeneCards
DBX2	GeneCards
INSC	GeneCards
GZF1	GeneCards
HS3ST4	GeneCards
PIEZO2	GeneCards
PCBP3	GeneCards
NOC3L	GeneCards
LRRC2	GeneCards
MED26	GeneCards
MEX3D	GeneCards
ZNF496	GeneCards
ZIC5	GeneCards
SNX19	GeneCards
SURF2	GeneCards
TOMM7	GeneCards
SH3D19	GeneCards
SCGB2A1	GeneCards
RSAD1	GeneCards
RFX4	GeneCards
RAP2C	GeneCards
SDK1	GeneCards
CEP97	GeneCards
CPQ	GeneCards
ADAT3	GeneCards
BRWD3	GeneCards
CHERP	GeneCards
LUZP2	GeneCards
ZNF426	GeneCards
ZBTB11	GeneCards
RGS22	GeneCards
XIRP2	GeneCards
CASD1	GeneCards
DLK2	GeneCards
EML3	GeneCards
GALNTL6	GeneCards
FXYD4	GeneCards
KBTBD11	GeneCards
NKAIN2	GeneCards
N4BP2	GeneCards
MED16	GeneCards
POC5	GeneCards
YIPF2	GeneCards
ZBTB2	GeneCards
ZNF266	GeneCards
TBC1D8B	GeneCards
SYDE1	GeneCards
TSPYL5	GeneCards
WDR18	GeneCards
UNC80	GeneCards
SLC35E3	GeneCards
RAVER1	GeneCards
PPAN	GeneCards
RAB43	GeneCards
RIC8B	GeneCards
ZBED4	GeneCards
SLITRK4	GeneCards
WIZ	GeneCards
CST9	GeneCards
CALHM2	GeneCards
FAM114A1	GeneCards
GRWD1	GeneCards
KRI1	GeneCards
LMF2	GeneCards
MYOZ3	GeneCards
MYDGF	GeneCards
NACC2	GeneCards
MMS22L	GeneCards
MIDN	GeneCards
MIER2	GeneCards
ZNF561	GeneCards
ZNF562	GeneCards
ZNF236	GeneCards
TSPAN11	GeneCards
SCAF1	GeneCards
TMEM120B	GeneCards
ZNF559	GeneCards
COPRS	GeneCards
C7orf50	GeneCards
CDKN2AIPNL	GeneCards
C10orf90	GeneCards
C19orf44	GeneCards
FAM189A1	GeneCards
FAM81A	GeneCards
HSD11B1L	GeneCards
ISY1	GeneCards
JADE2	GeneCards
LDLRAD3	GeneCards
HMCES	GeneCards
NYAP2	GeneCards
MISP	GeneCards
ZDBF2	GeneCards
POMZP3	GeneCards
SBNO2	GeneCards
OR10H2	GeneCards
RABL2B	GeneCards
TMEM259	GeneCards
SMIM14	GeneCards
CSTL1	GeneCards
ARMT1	GeneCards
HMGN5	GeneCards
OBP2B	GeneCards
FRMPD3	GeneCards
PRR12	GeneCards
TFDP3	GeneCards
SLC35G1	GeneCards
CCDC171	GeneCards
ATXN7L3B	GeneCards
CCDC172	GeneCards
ARHGAP45	GeneCards
FAM71D	GeneCards
ZNF121	GeneCards
OR10H4	GeneCards
RGPD3	GeneCards
ZGLP1	GeneCards
ZNF846	GeneCards
CALHM3	GeneCards
C4orf45	GeneCards
C2CD4C	GeneCards
NUP62CL	GeneCards
MAP10	GeneCards
PRORP	GeneCards
OR10H3	GeneCards
OR10H5	GeneCards
PRSS48	GeneCards
TMEM196	GeneCards
SWSAP1	GeneCards
ECRG4	GeneCards
LCE2B	GeneCards
DUSP29	GeneCards
MALRD1	GeneCards
VCX2	GeneCards
SERTM1	GeneCards
TMEM170B	GeneCards
SMIM7	GeneCards
C10orf105	GeneCards
C18orf63	GeneCards
LCE2A	GeneCards
DCDC2C	GeneCards
TMEM178B	GeneCards
SELENOO	GeneCards
RFLNA	GeneCards
COLCA2	GeneCards
YJU2	GeneCards
COLCA1	GeneCards
DIPK1C	GeneCards
FHIP1A	GeneCards
MIR34B	GeneCards
RMST	GeneCards
CFAP92	GeneCards
MIR34C	GeneCards
ADM5	GeneCards
HOATZ	GeneCards
C9orf92	GeneCards
HNF1A-AS1	GeneCards
CIRBP-AS1	GeneCards
GUSBP1	GeneCards
LINC00877	GeneCards
BUB1B-PAK6	GeneCards
LINC01089	GeneCards
GLIS3-AS1	GeneCards
GSG1L2	GeneCards
MIR651	GeneCards
LINC00540	GeneCards
RPL32P3	GeneCards
SNORD24	GeneCards
SNORD33	GeneCards
POT1-AS1	GeneCards
ERCC6L2-AS1	GeneCards
HSP90AA4P	GeneCards
LIFR-AS1	GeneCards
LINC00856	GeneCards
LINC01262	GeneCards
SNORD36A	GeneCards
SNORD36B	GeneCards
SNORD35A	GeneCards
SNORD35B	GeneCards
SNORD36C	GeneCards
CLYBL-AS1	GeneCards
EGFLAM-AS1	GeneCards
ITGA9-AS1	GeneCards
ILF3-DT	GeneCards
MIR365B	GeneCards
MIR646HG	GeneCards
LINC02085	GeneCards
LINC01237	GeneCards
LMCD1-AS1	GeneCards
MIATNB	GeneCards
RNF217-AS1	GeneCards
SNORD29	GeneCards
UGDH-AS1	GeneCards
CLYBL-AS2	GeneCards
JAKMIP2-AS1	GeneCards
NEURL1-AS1	GeneCards
LINC01208	GeneCards
LINC01250	GeneCards
LINC01498	GeneCards
HSP90AA6P	GeneCards
DPP9-AS1	GeneCards
LINC01762	GeneCards
LINC01324	GeneCards
LINC01422	GeneCards
LINC02363	GeneCards
LINP1	GeneCards
PTOV1-AS2	GeneCards
LINC01320	GeneCards
RNF213-AS1	GeneCards
RFX3-DT	GeneCards
LOC100288123	GeneCards
LOC102546229	GeneCards
CYP4F24P	GeneCards
LINC00693	GeneCards
DTX2P1-UPK3BP1-PMS2P11	GeneCards
LINC02882	GeneCards
MIR2113	GeneCards
LINC01700	GeneCards
MIR5702	GeneCards
LINC01950	GeneCards
LINC01973	GeneCards
LINC01228	GeneCards
LINC01428	GeneCards
LINC01608	GeneCards
LINC01304	GeneCards
TMED2-DT	GeneCards
SNHG26	GeneCards
SRP54-AS1	GeneCards
FAUP1	GeneCards
KRT18P14	GeneCards
LINC02751	GeneCards
LINC01694	GeneCards
LINC02006	GeneCards
LINC01775	GeneCards
LINC01855	GeneCards
LINC02241	GeneCards
RPS10P11	GeneCards
SKP1P2	GeneCards
USP6NL-AS1	GeneCards
ENSG00000254919	GeneCards
CFAP100-DT	GeneCards
KBTBD11-AS1	GeneCards
LINC02605	GeneCards
GTF2IRD1P1	GeneCards
MIR4475	GeneCards
MIR5007	GeneCards
LINC01987	GeneCards
LINC02214	GeneCards
UBE2L4	GeneCards
SDHDP4	GeneCards
ENSG00000235888	GeneCards
ENSG00000254789	GeneCards
ENSG00000255446	GeneCards
ENSG00000255458	GeneCards
CLEC4OP	GeneCards
CYCSP39	GeneCards
FTH1P7	GeneCards
LINC02785	GeneCards
PAFAH1B2P2	GeneCards
NXT1-AS1	GeneCards
LINC01661	GeneCards
LINC01718	GeneCards
LINC01809	GeneCards
LINC01826	GeneCards
LINC02239	GeneCards
LINC02382	GeneCards
LINC02391	GeneCards
LIX1-AS1	GeneCards
UNGP1	GeneCards
RNU6-369P	GeneCards
RNA5SP478	GeneCards
SDK1-AS1	GeneCards
RNU6-456P	GeneCards
RPL12P33	GeneCards
RPL17P34	GeneCards
RPL21P75	GeneCards
SNRPEP4	GeneCards
ENSG00000235070	GeneCards
ENSG00000214650	GeneCards
ENSG00000227186	GeneCards
ENSG00000255126	GeneCards
ENSG00000260461	GeneCards
ENSG00000260613	GeneCards
ENSG00000267159	GeneCards
ENSG00000267273	GeneCards
ENSG00000267317	GeneCards
ENSG00000267904	GeneCards
ENSG00000268189	GeneCards
ENSG00000269578	GeneCards
ENSG00000270130	GeneCards
ENSG00000237609	GeneCards
ENSG00000251455	GeneCards
ENSG00000257452	GeneCards
ENSG00000267030	GeneCards
ENSG00000268047	GeneCards
ENSG00000269427	GeneCards
ENSG00000269938	GeneCards
ENSG00000248559	GeneCards
ENSG00000250348	GeneCards
ENSG00000250994	GeneCards
ENSG00000256306	GeneCards
ENSG00000267510	GeneCards
ENSG00000267607	GeneCards
ENSG00000268670	GeneCards
ENSG00000251189	GeneCards
ENSG00000267255	GeneCards
ENSG00000268087	GeneCards
ENSG00000269044	GeneCards
ENSG00000269807	GeneCards
ENSG00000269997	GeneCards
ENSG00000270061	GeneCards
ENSG00000235151	GeneCards
ARMC10P1	GeneCards
KRT18P33	GeneCards
HSPA8P15	GeneCards
HNF4GP1	GeneCards
LINC02699	GeneCards
LINC02770	GeneCards
GTF2IP23	GeneCards
LINC02512	GeneCards
LINC02386	GeneCards
PLD5P1	GeneCards
ZBTB12BP	GeneCards
RRM2P4	GeneCards
UQCRC2P1	GeneCards
RNA5SP189	GeneCards
RNU6ATAC11P	GeneCards
RPL21P81	GeneCards
RPS27P10	GeneCards
RNA5SP455	GeneCards
RNU6-1134P	GeneCards
RNU6-655P	GeneCards
RPL23P10	GeneCards
RNU6-1211P	GeneCards
RNU7-165P	GeneCards
RPL21P41	GeneCards
RPL23AP12	GeneCards
RPL37P4	GeneCards
RNU1-139P	GeneCards
RNU1-74P	GeneCards
RPS27P22	GeneCards
RSL24D1P5	GeneCards
SNRPGP6	GeneCards
RAET1M	GeneCards
LOC101929165	GeneCards
ENSG00000201451	GeneCards
ENSG00000224272	GeneCards
ENSG00000234149	GeneCards
LOC101927066	GeneCards
ENSG00000248624	GeneCards
ENSG00000266877	GeneCards
ENSG00000267303	GeneCards
ENSG00000254964	GeneCards
ENSG00000255508	GeneCards
ENSG00000260648	GeneCards
ENSG00000268743	GeneCards
ENSG00000261526	GeneCards
ENSG00000267769	GeneCards
ENSG00000272040	GeneCards
BIN2P2	GeneCards
CHEK2P5	GeneCards
DHFRP3	GeneCards
ARL2BPP7	GeneCards
EIF4A3P1	GeneCards
MTND3P4	GeneCards
PHB1P1	GeneCards
NAP1L4P2	GeneCards
MRPS17P3	GeneCards
MYL12BP2	GeneCards
MIR11181	GeneCards
SRSF3P4	GeneCards
TUBBP8	GeneCards
VWA8P1	GeneCards
RN7SKP228	GeneCards
RNU6-533P	GeneCards
RPS21P2	GeneCards
RPS27P12	GeneCards
RNU6-1328P	GeneCards
RPL3P9	GeneCards
SERPINA7P1	GeneCards
SLC25A5P9	GeneCards
RN7SL167P	GeneCards
RN7SL300P	GeneCards
RNU6-525P	GeneCards
RPL35AP15	GeneCards
RPL35P5	GeneCards
RPL6P25	GeneCards
NRIP3-DT	GeneCards
SEPTIN7P1	GeneCards
SNX33P1	GeneCards
ENSG00000286703	GeneCards
ENSG00000286774	GeneCards
ENSG00000287357	GeneCards
lnc-MYH13-3	GeneCards
ENSG00000287928	GeneCards
ENSG00000272836	GeneCards
ENSG00000283563	GeneCards
ENSG00000250568	GeneCards
ENSG00000272249	GeneCards
ENSG00000248234	GeneCards
ENSG00000251844	GeneCards
ENSG00000273192	GeneCards
ENSG00000272849	GeneCards
ENSG00000273137	GeneCards
ENSG00000275162	GeneCards
ENSG00000275178	GeneCards
ENSG00000278330	GeneCards
lnc-COPG1-3	GeneCards
HSALNG0093344	GeneCards
ENSG00000235271	GeneCards
RF00017-4516	GeneCards
GNAI2P2	GeneCards
EI24P1	GeneCards
KSR1P1	GeneCards
HNRNPCP10	GeneCards
HNRNPH1P2	GeneCards
NSA2P4	GeneCards
NDUFB9P3	GeneCards
RNU6ATAC13P	GeneCards
RFPL4AP3	GeneCards
lnc-IRS1-1	GeneCards
lnc-MBP-13	GeneCards
lnc-STOX2-10	GeneCards
ENSG00000279198	GeneCards
ENSG00000255093	GeneCards
ENSG00000273450	GeneCards
ENSG00000277935	GeneCards
ENSG00000258790	GeneCards
ENSG00000288720	GeneCards
lnc-CAMKK2-1	GeneCards
lnc-COPG1-2	GeneCards
hsa-miR-5096-021	GeneCards
lnc-ABO-33	GeneCards
lnc-COPRS-1	GeneCards
hsa-miR-5096-072	GeneCards
lnc-BTG4-3	GeneCards
lnc-SCARB1-5	GeneCards
lnc-SOX6-6	GeneCards
lnc-TUBGCP6-1	GeneCards
lnc-WDR18-2	GeneCards
lnc-TULP2-3	GeneCards
NONHSAG025023.2-001	GeneCards
ANAPC15P2	GeneCards
ACER2P1	GeneCards
H2ACP1	GeneCards
ELOAP1	GeneCards
MTCYBP19	GeneCards
MTCYBP36	GeneCards
PPP1R2P8	GeneCards
RNU6-995P	GeneCards
SAPCD2P3	GeneCards
ENSG00000285810	GeneCards
ENSG00000286082	GeneCards
ENSG00000286594	GeneCards
lnc-IL6-7	GeneCards
lnc-LDLRAD3-1	GeneCards
lnc-ICAM3-1	GeneCards
lnc-IQGAP2-1	GeneCards
lnc-LDHAL6B-3	GeneCards
lnc-MYDGF-2	GeneCards
lnc-LZTFL1-3	GeneCards
lnc-MRPL46-8	GeneCards
LOC105370047	GeneCards
LOC107986450	GeneCards
LOC110091768	GeneCards
lnc-NAALADL2-9	GeneCards
lnc-NCOR2-4	GeneCards
lnc-STK26-6	GeneCards
lnc-NEU4-1	GeneCards
LOC105376568	GeneCards
ENSG00000267370	GeneCards
ENSG00000285731	GeneCards
ENSG00000250350	GeneCards
ENSG00000279527	GeneCards
ENSG00000288724	GeneCards
HSALNG0055755	GeneCards
HSALNG0055761	GeneCards
HSALNG0025678	GeneCards
HSALNG0042408	GeneCards
HSALNG0075212	GeneCards
LOC107985485	GeneCards
HSALNG0087098	GeneCards
HSALNG0123410	GeneCards
HSALNG0123921	GeneCards
HSALNG0124417-001	GeneCards
HSALNG0136270	GeneCards
HSALNG0140178	GeneCards
lnc-AADAT-11	GeneCards
lnc-DUSP13-1	GeneCards
lnc-FAM126A-2	GeneCards
ENSG00000249943	GeneCards
ENSG00000256678	GeneCards
HSALNG0109339	GeneCards
HSALNG0124416	GeneCards
lnc-AMZ1-4	GeneCards
HSALNG0091866	GeneCards
HSALNG0106290	GeneCards
HSALNG0122951	GeneCards
lnc-ARMT1-2	GeneCards
lnc-CDC37-1	GeneCards
HSALNG0026812	GeneCards
HSALNG0039004	GeneCards
HSALNG0042757	GeneCards
HSALNG0080369	GeneCards
HSALNG0094814	GeneCards
HSALNG0123412	GeneCards
HSALNG0126918	GeneCards
lnc-BET1-4	GeneCards
lnc-PDE4A-3	GeneCards
lnc-PRSS48-2	GeneCards
lnc-SCARB1-4	GeneCards
lnc-PPP2R3C-2	GeneCards
lnc-SETD1B-4	GeneCards
lnc-SLC35G1-1	GeneCards
lnc-UPK3B-2	GeneCards
lnc-TBL1XR1-6	GeneCards
MN298114-203	GeneCards
NONHSAG024308.2	GeneCards
NONHSAG050827.2	GeneCards
NONHSAG006253.2	GeneCards
piR-32559-282	GeneCards
piR-36887-008	GeneCards
MK280269-046	GeneCards
NONHSAG053687.2	GeneCards
piR-36746-014	GeneCards
piR-48499	GeneCards
piR-32285-064	GeneCards
piR-32559-090	GeneCards
piR-51043	GeneCards
piR-58075	GeneCards
piR-59050	GeneCards
RF00017-2494	GeneCards
RF00017-2500	GeneCards
RF00017-2813	GeneCards
piR-54764-266	GeneCards
RF00017-5974	GeneCards
piR-59907-030	GeneCards
RF00017-4183	GeneCards
RF00017-5575	GeneCards
RF00017-7611	GeneCards
RF00017-4103	GeneCards
RF00017-4180	GeneCards
RF00017-4517	GeneCards
RF00994-136	GeneCards
RNU7-37P	GeneCards
lnc-KAT6B-1	GeneCards
lnc-IRS1-8	GeneCards
lnc-LDHAL6B-2	GeneCards
LOC107986082	GeneCards
LOC101927711	GeneCards
LOC105374102	GeneCards
LOC112267993	GeneCards
LOC105378438	GeneCards
ENSG00000285740	GeneCards
HSALNG0037855	GeneCards
HSALNG0040079	GeneCards
HSALNG0059646	GeneCards
HSALNG0024860	GeneCards
HSALNG0030835	GeneCards
HSALNG0037853	GeneCards
HSALNG0040961	GeneCards
HSALNG0042774	GeneCards
HSALNG0069691-001	GeneCards
HSALNG0069693	GeneCards
HSALNG0078920	GeneCards
HSALNG0023725	GeneCards
HSALNG0023726	GeneCards
HSALNG0025661	GeneCards
HSALNG0038536	GeneCards
HSALNG0054362	GeneCards
HSALNG0078914	GeneCards
HSALNG0078923	GeneCards
HSALNG0079786	GeneCards
LOC105379042	GeneCards
HSALNG0092197	GeneCards
HSALNG0129247	GeneCards
HSALNG0129256	GeneCards
hsa-miR-5095-339	GeneCards
HSALNG0115714	GeneCards
HSALNG0138801	GeneCards
HSALNG0138810	GeneCards
HSALNG0123411	GeneCards
HSALNG0129255	GeneCards
HSALNG0011531	GeneCards
HSALNG0042915	GeneCards
HSALNG0078919	GeneCards
HSALNG0122433	GeneCards
lnc-RHOF-2	GeneCards
lnc-SMIM14-5	GeneCards
lnc-UXS1-6	GeneCards
MK280073-186	GeneCards
NONHSAG047094.2	GeneCards
piR-33573	GeneCards
piR-38580-054	GeneCards
piR-49220	GeneCards
piR-51671-076	GeneCards
NONHSAG012343.2	GeneCards
piR-32407-003	GeneCards
piR-32810-041	GeneCards
piR-33303-019	GeneCards
piR-41399-421	GeneCards
piR-43103-089	GeneCards
piR-46002-460	GeneCards
piR-50129-269	GeneCards
piR-32214-182	GeneCards
piR-36393-462	GeneCards
piR-50443-519	GeneCards
MN298114-077	GeneCards
piR-48349-008	GeneCards
piR-48759-358	GeneCards
piR-50447-008	GeneCards
piR-50968-032	GeneCards
RF00017-4381	GeneCards
RF00017-6981	GeneCards
piR-59907-012	GeneCards
RF00017-4384	GeneCards
piR-56759-503	GeneCards
piR-61028-511	GeneCards
RF00017-2485	GeneCards
RF00017-4383	GeneCards
piR-53562-351	GeneCards
RF00017-6405	GeneCards
RF00619-027	GeneCards
SNODB276	GeneCards
HSALNG0003922	GeneCards
HSALNG0095673	GeneCards
HSALNG0003920	GeneCards
HSALNG0003921	GeneCards
HSALNG0095676	GeneCards
piR-36573-073	GeneCards
piR-36588-267	GeneCards
piR-58629	GeneCards
piR-56133-133	GeneCards
piR-57394-206	GeneCards
AP2M1	GeneCards
USP13	GeneCards
PABPC4	GeneCards
KPNA2	GeneCards
RNASEL	GeneCards
LY6E	GeneCards
ATP1B1	GeneCards
PLOD2	GeneCards
NUP214	GeneCards
HYOU1	GeneCards
SIRT5	GeneCards
PCNT	GeneCards
EIF4H	GeneCards
ERC1	GeneCards
NIN	GeneCards
ERP44	GeneCards
FKBP10	GeneCards
CEP250	GeneCards
SIL1	GeneCards
CEP135	GeneCards
HECTD1	GeneCards
EDEM3	GeneCards
CNTRL	GeneCards
CHPF2	GeneCards
MYCBP2	GeneCards
ERLEC1	GeneCards
GOLGA3	GeneCards
CCDC86	GeneCards
DNAJC11	GeneCards
ARL6IP6	GeneCards
SPART	GeneCards
COMT	GeneCards
RIPK1	GeneCards
ADAM9	GeneCards
CSNK2A2	GeneCards
NEK9	GeneCards
TOR1A	GeneCards
PMPCA	GeneCards
PMPCB	GeneCards
PVR	GeneCards
RTN4	GeneCards
NARS2	GeneCards
NUP98	GeneCards
GGH	GeneCards
PLD3	GeneCards
RAB2A	GeneCards
PITRM1	GeneCards
PDE4DIP	GeneCards
RAB1A	GeneCards
VPS11	GeneCards
ATE1	GeneCards
ALG11	GeneCards
EIF4E2	GeneCards
HS6ST2	GeneCards
LMAN2	GeneCards
MTCH1	GeneCards
NPTX1	GeneCards
ATP13A3	GeneCards
GOLGA7	GeneCards
MDN1	GeneCards
ZDHHC5	GeneCards
INTS4	GeneCards
QSOX2	GeneCards
SCCPDH	GeneCards
TIMM10B	GeneCards
FAM8A1	GeneCards
COQ8B	GeneCards
FAM98A	GeneCards
SELENOS	GeneCards
CXCL9	GeneCards
