# Supplementary material for: Exploring the potential mechanism of emetine against coronavirus disease 2019 combined with lung adenocarcinoma: bioinformatics and molecular simulation analyses
Source: BMC Cancer. 2022 Jun 22;22:687. doi: 10.1186/s12885-022-09763-2 (PMC9214478; doi:10.1186/s12885-022-09763-2)
Supplement: Supplementary file 3 — Additional file 3. Univariate Cox proportional hazards regression analysis of the intersecting genes of COVID-19 and LUAD. [file 12885_2022_9763_MOESM3_ESM.xls]

## Sheet: Sheet1
Univariate Cox proportional hazards regression analysis of the intersecting genes of COVID-19 and LUAD
Symbol	HR	HR.95L	HR.95H	P-value
AGER	0.887585	0.820779	0.959828	0.00281783
BTK	0.720149	0.596832	0.868946	0.000612892
CAT	0.7212	0.594584	0.874779	0.00090603
CCL20	1.1123	1.03347	1.19714	0.00454262
CPA3	0.859295	0.779423	0.947351	0.00231468
ERG	0.696182	0.535043	0.905852	0.00701547
F2	1.31217	1.11889	1.53884	0.000832512
FURIN	1.2187	1.08685	1.36654	0.000710353
GDF15	0.874047	0.795903	0.959862	0.00484344
IL33	0.837235	0.736816	0.95134	0.00642647
LDHA	1.76346	1.42839	2.17715	1.31988e-07
MIF	1.29547	1.09171	1.53726	0.00302803
P2RY14	0.668828	0.504599	0.886508	0.00514323
SFTPD	0.900909	0.848236	0.956852	0.000686626
TRPA1	2.68319	1.80063	3.99833	1.23498e-06
OAS3	1.2208	1.04945	1.42014	0.00972674
LMNB1	1.27629	1.08984	1.49463	0.00246462
CFTR	0.77099	0.663613	0.895742	0.000676718
SFTPC	0.93871	0.900886	0.978122	0.00257717
TRIM59	1.51633	1.1321	2.03096	0.00523621
NTRK3	0.0679234	0.00988847	0.466563	0.00623114
GRIA1	0.318166	0.166872	0.606629	0.000505151
LIFR	0.729373	0.616652	0.862697	0.000229384
MELK	1.23981	1.0882	1.41254	0.00123721
LMNB2	1.3444	1.11651	1.6188	0.00179046
KLF15	0.80012	0.683742	0.936306	0.00542547
HPSE2	0.410647	0.226477	0.744583	0.0033751
MUC2	1.29231	1.09541	1.5246	0.00236243
MAL	0.79678	0.682484	0.930217	0.00403235
POU2AF1	0.823433	0.714245	0.949313	0.00743657
STK32A	0.775113	0.661819	0.907802	0.00157905
ZIC5	2.00242	1.36693	2.93334	0.000364419
SDK1	0.799488	0.691039	0.924956	0.00262278
NUP62CL	1.42809	1.16421	1.75177	0.000629261
RFLNA	1.20576	1.05021	1.38435	0.00792775
LINP1	1.24058	1.08576	1.41748	0.00152589
KRT18P14	221.718	10.4399	4708.77	0.000531328
KPNA2	1.35678	1.16269	1.58326	0.000107184
PLOD2	1.20834	1.07724	1.35539	0.00123867
