# Supplementary material for: Exploring the potential mechanism of emetine against coronavirus disease 2019 combined with lung adenocarcinoma: bioinformatics and molecular simulation analyses
Source: BMC Cancer. 2022 Jun 22;22:687. doi: 10.1186/s12885-022-09763-2 (PMC9214478; doi:10.1186/s12885-022-09763-2)
Supplement: Supplementary file 4 — Additional file 4. GO enrichment analysis of the targets of emetine against LUAD/COVID-19. [file 12885_2022_9763_MOESM4_ESM.xls]

## Sheet: Sheet1
GO enrichment analysis of the targets of emetine against LUAD/COVID-19
ONTOLOGY	ID	Description	GeneRatio	BgRatio	pvalue	p.adjust	qvalue	geneID	Count
BP	GO:0002688	regulation of leukocyte chemotaxis	2022-03-06	119/18862	4.82979e-06	0.00285242	0.000730753	DPP4/IL6/MIF	3
BP	GO:0010715	regulation of extracellular matrix disassembly	2022-02-06	17/18862	1.14442e-05	0.00285242	0.000730753	DPP4/IL6	2
BP	GO:0002689	negative regulation of leukocyte chemotaxis	2022-02-06	19/18862	1.43854e-05	0.00285242	0.000730753	DPP4/MIF	2
BP	GO:0002685	regulation of leukocyte migration	2022-03-06	205/18862	2.47009e-05	0.00285242	0.000730753	DPP4/IL6/MIF	3
BP	GO:0097529	myeloid leukocyte migration	2022-03-06	218/18862	2.96841e-05	0.00285242	0.000730753	DPP4/IL6/MIF	3
BP	GO:0050920	regulation of chemotaxis	2022-03-06	224/18862	3.21919e-05	0.00285242	0.000730753	DPP4/IL6/MIF	3
BP	GO:0030595	leukocyte chemotaxis	2022-03-06	226/18862	3.30579e-05	0.00285242	0.000730753	DPP4/IL6/MIF	3
BP	GO:0060326	cell chemotaxis	2022-03-06	306/18862	8.15545e-05	0.005471	0.0014016	DPP4/IL6/MIF	3
BP	GO:0002686	negative regulation of leukocyte migration	2022-02-06	46/18862	8.67373e-05	0.005471	0.0014016	DPP4/MIF	2
BP	GO:1903053	regulation of extracellular matrix organization	2022-02-06	47/18862	9.05795e-05	0.005471	0.0014016	DPP4/IL6	2
BP	GO:0051251	positive regulation of lymphocyte activation	2022-03-06	356/18862	0.000127825	0.00617483	0.00158191	DPP4/IL6/MIF	3
BP	GO:0002449	lymphocyte mediated immunity	2022-03-06	360/18862	0.00013213	0.00617483	0.00158191	IL6/PRF1/SERPING1	3
BP	GO:0002460	adaptive immune response based on somatic recombination of immune receptors built from immunoglobulin superfamily domains	2022-03-06	367/18862	0.000139893	0.00617483	0.00158191	IL6/PRF1/SERPING1	3
BP	GO:0043030	regulation of macrophage activation	2022-02-06	59/18862	0.000143125	0.00617483	0.00158191	IL6/MIF	2
BP	GO:0050922	negative regulation of chemotaxis	2022-02-06	64/18862	0.000168519	0.00619306	0.00158658	DPP4/MIF	2
BP	GO:0032102	negative regulation of response to external stimulus	2022-03-06	394/18862	0.000172629	0.00619306	0.00158658	DPP4/MIF/SERPING1	3
BP	GO:0002696	positive regulation of leukocyte activation	2022-03-06	401/18862	0.000181864	0.00619306	0.00158658	DPP4/IL6/MIF	3
BP	GO:0002683	negative regulation of immune system process	2022-03-06	403/18862	0.000184561	0.00619306	0.00158658	DPP4/MIF/SERPING1	3
BP	GO:0050867	positive regulation of cell activation	2022-03-06	412/18862	0.000197022	0.00626324	0.00160456	DPP4/IL6/MIF	3
BP	GO:0022617	extracellular matrix disassembly	2022-02-06	81/18862	0.000270183	0.00815953	0.00209036	DPP4/IL6	2
BP	GO:0023061	signal release	2022-03-06	475/18862	0.000299924	0.00855748	0.00219231	DPP4/IL6/SLC6A4	3
BP	GO:0032760	positive regulation of tumor necrosis factor production	2022-02-06	87/18862	0.000311696	0.00855748	0.00219231	IL6/MIF	2
BP	GO:1903557	positive regulation of tumor necrosis factor superfamily cytokine production	2022-02-06	90/18862	0.000333551	0.00875933	0.00224403	IL6/MIF	2
BP	GO:0042116	macrophage activation	2022-02-06	102/18862	0.000428265	0.0107556	0.00275545	IL6/MIF	2
BP	GO:0002456	T cell mediated immunity	2022-02-06	104/18862	0.000445183	0.0107556	0.00275545	IL6/PRF1	2
BP	GO:0033138	positive regulation of peptidyl-serine phosphorylation	2022-02-06	107/18862	0.000471165	0.0109455	0.0028041	IL6/MIF	2
BP	GO:0050671	positive regulation of lymphocyte proliferation	2022-02-06	135/18862	0.00074851	0.0163851	0.00419765	IL6/MIF	2
BP	GO:0032946	positive regulation of mononuclear cell proliferation	2022-02-06	136/18862	0.000759575	0.0163851	0.00419765	IL6/MIF	2
BP	GO:0033135	regulation of peptidyl-serine phosphorylation	2022-02-06	143/18862	0.000839249	0.0174795	0.00447803	IL6/MIF	2
BP	GO:0070665	positive regulation of leukocyte proliferation	2022-02-06	148/18862	0.00089854	0.0179799	0.00460622	IL6/MIF	2
BP	GO:0050871	positive regulation of B cell activation	2022-02-06	150/18862	0.000922811	0.0179799	0.00460622	IL6/MIF	2
BP	GO:0032680	regulation of tumor necrosis factor production	2022-02-06	160/18862	0.00104891	0.0195687	0.00501324	IL6/MIF	2
BP	GO:0032640	tumor necrosis factor production	2022-02-06	162/18862	0.00107507	0.0195687	0.00501324	IL6/MIF	2
BP	GO:1903555	regulation of tumor necrosis factor superfamily cytokine production	2022-02-06	164/18862	0.00110155	0.0195687	0.00501324	IL6/MIF	2
BP	GO:0071706	tumor necrosis factor superfamily cytokine production	2022-02-06	167/18862	0.00114186	0.0197052	0.00504822	IL6/MIF	2
BP	GO:0051260	protein homooligomerization	2022-02-06	177/18862	0.00128132	0.0211514	0.0054187	MIF/PRF1	2
BP	GO:0050796	regulation of insulin secretion	2022-02-06	178/18862	0.0012957	0.0211514	0.0054187	DPP4/IL6	2
BP	GO:0050731	positive regulation of peptidyl-tyrosine phosphorylation	2022-02-06	193/18862	0.0015207	0.0235513	0.00603354	IL6/MIF	2
BP	GO:0050864	regulation of B cell activation	2022-02-06	193/18862	0.0015207	0.0235513	0.00603354	IL6/MIF	2
BP	GO:0030073	insulin secretion	2022-02-06	207/18862	0.00174646	0.0262217	0.00671765	DPP4/IL6	2
BP	GO:0090276	regulation of peptide hormone secretion	2022-02-06	209/18862	0.00177995	0.0262217	0.00671765	DPP4/IL6	2
BP	GO:0050870	positive regulation of T cell activation	2022-02-06	212/18862	0.00183076	0.0262533	0.00672575	DPP4/IL6	2
BP	GO:0050670	regulation of lymphocyte proliferation	2022-02-06	221/18862	0.00198734	0.0262533	0.00672575	IL6/MIF	2
BP	GO:0032944	regulation of mononuclear cell proliferation	2022-02-06	223/18862	0.00202298	0.0262533	0.00672575	IL6/MIF	2
BP	GO:0051259	protein complex oligomerization	2022-02-06	229/18862	0.00213174	0.0262533	0.00672575	MIF/PRF1	2
BP	GO:1903039	positive regulation of leukocyte cell-cell adhesion	2022-02-06	234/18862	0.00222447	0.0262533	0.00672575	DPP4/IL6	2
BP	GO:0070663	regulation of leukocyte proliferation	2022-02-06	241/18862	0.0023575	0.0262533	0.00672575	IL6/MIF	2
BP	GO:0030072	peptide hormone secretion	2022-02-06	247/18862	0.00247449	0.0262533	0.00672575	DPP4/IL6	2
BP	GO:0046883	regulation of hormone secretion	2022-02-06	260/18862	0.0027373	0.0262533	0.00672575	DPP4/IL6	2
BP	GO:0051607	defense response to virus	2022-02-06	260/18862	0.0027373	0.0262533	0.00672575	IL6/PRF1	2
BP	GO:0140546	defense response to symbiont	2022-02-06	260/18862	0.0027373	0.0262533	0.00672575	IL6/PRF1	2
BP	GO:0050730	regulation of peptidyl-tyrosine phosphorylation	2022-02-06	262/18862	0.00277887	0.0262533	0.00672575	IL6/MIF	2
BP	GO:0022409	positive regulation of cell-cell adhesion	2022-02-06	276/18862	0.00307825	0.0262533	0.00672575	DPP4/IL6	2
BP	GO:0050708	regulation of protein secretion	2022-02-06	279/18862	0.00314431	0.0262533	0.00672575	DPP4/IL6	2
BP	GO:0001820	serotonin secretion	2022-01-06	10/18862	0.00317721	0.0262533	0.00672575	SLC6A4	1
BP	GO:0051712	positive regulation of killing of cells of other organism	2022-01-06	10/18862	0.00317721	0.0262533	0.00672575	PRF1	1
BP	GO:0070091	glucagon secretion	2022-01-06	10/18862	0.00317721	0.0262533	0.00672575	IL6	1
BP	GO:0070092	regulation of glucagon secretion	2022-01-06	10/18862	0.00317721	0.0262533	0.00672575	IL6	1
BP	GO:0097050	type B pancreatic cell apoptotic process	2022-01-06	10/18862	0.00317721	0.0262533	0.00672575	IL6	1
BP	GO:1902510	regulation of apoptotic DNA fragmentation	2022-01-06	10/18862	0.00317721	0.0262533	0.00672575	IL6	1
BP	GO:1905522	negative regulation of macrophage migration	2022-01-06	10/18862	0.00317721	0.0262533	0.00672575	MIF	1
BP	GO:2000659	regulation of interleukin-1-mediated signaling pathway	2022-01-06	10/18862	0.00317721	0.0262533	0.00672575	IL6	1
BP	GO:0046651	lymphocyte proliferation	2022-02-06	282/18862	0.00321105	0.0262533	0.00672575	IL6/MIF	2
BP	GO:0032943	mononuclear cell proliferation	2022-02-06	285/18862	0.00327845	0.0262533	0.00672575	IL6/MIF	2
BP	GO:0010739	positive regulation of protein kinase A signaling	2022-01-06	11/18862	0.00349446	0.0262533	0.00672575	MIF	1
BP	GO:0021936	regulation of cerebellar granule cell precursor proliferation	2022-01-06	11/18862	0.00349446	0.0262533	0.00672575	SLC6A4	1
BP	GO:0033632	regulation of cell-cell adhesion mediated by integrin	2022-01-06	11/18862	0.00349446	0.0262533	0.00672575	DPP4	1
BP	GO:0051610	serotonin uptake	2022-01-06	11/18862	0.00349446	0.0262533	0.00672575	SLC6A4	1
BP	GO:2000551	regulation of T-helper 2 cell cytokine production	2022-01-06	11/18862	0.00349446	0.0262533	0.00672575	IL6	1
BP	GO:0046879	hormone secretion	2022-02-06	302/18862	0.00367306	0.0262533	0.00672575	DPP4/IL6	2
BP	GO:0001867	complement activation, lectin pathway	2022-01-06	12/18862	0.00381164	0.0262533	0.00672575	SERPING1	1
BP	GO:0007320	insemination	2022-01-06	12/18862	0.00381164	0.0262533	0.00672575	SLC6A4	1
BP	GO:0032494	response to peptidoglycan	2022-01-06	12/18862	0.00381164	0.0262533	0.00672575	IL6	1
BP	GO:0035641	locomotory exploration behavior	2022-01-06	12/18862	0.00381164	0.0262533	0.00672575	DPP4	1
BP	GO:0061744	motor behavior	2022-01-06	12/18862	0.00381164	0.0262533	0.00672575	DPP4	1
BP	GO:1903624	regulation of DNA catabolic process	2022-01-06	12/18862	0.00381164	0.0262533	0.00672575	IL6	1
BP	GO:1903800	positive regulation of production of miRNAs involved in gene silencing by miRNA	2022-01-06	12/18862	0.00381164	0.0262533	0.00672575	IL6	1
BP	GO:0002791	regulation of peptide secretion	2022-02-06	308/18862	0.00381745	0.0262533	0.00672575	DPP4/IL6	2
BP	GO:0018105	peptidyl-serine phosphorylation	2022-02-06	310/18862	0.00386617	0.0262533	0.00672575	IL6/MIF	2
BP	GO:0009914	hormone transport	2022-02-06	312/18862	0.00391518	0.0262533	0.00672575	DPP4/IL6	2
BP	GO:0070661	leukocyte proliferation	2022-02-06	312/18862	0.00391518	0.0262533	0.00672575	IL6/MIF	2
BP	GO:0001771	immunological synapse formation	2022-01-06	13/18862	0.00412873	0.0262533	0.00672575	PRF1	1
BP	GO:0002921	negative regulation of humoral immune response	2022-01-06	13/18862	0.00412873	0.0262533	0.00672575	SERPING1	1
BP	GO:0031053	primary miRNA processing	2022-01-06	13/18862	0.00412873	0.0262533	0.00672575	IL6	1
BP	GO:0035745	T-helper 2 cell cytokine production	2022-01-06	13/18862	0.00412873	0.0262533	0.00672575	IL6	1
BP	GO:1903054	negative regulation of extracellular matrix organization	2022-01-06	13/18862	0.00412873	0.0262533	0.00672575	DPP4	1
BP	GO:0042113	B cell activation	2022-02-06	326/18862	0.0042665	0.0262533	0.00672575	IL6/MIF	2
BP	GO:0050863	regulation of T cell activation	2022-02-06	327/18862	0.00429215	0.0262533	0.00672575	DPP4/IL6	2
BP	GO:0030336	negative regulation of cell migration	2022-02-06	330/18862	0.00436952	0.0262533	0.00672575	DPP4/MIF	2
BP	GO:1903037	regulation of leukocyte cell-cell adhesion	2022-02-06	330/18862	0.00436952	0.0262533	0.00672575	DPP4/IL6	2
BP	GO:0001780	neutrophil homeostasis	2022-01-06	14/18862	0.00444573	0.0262533	0.00672575	IL6	1
BP	GO:0032966	negative regulation of collagen biosynthetic process	2022-01-06	14/18862	0.00444573	0.0262533	0.00672575	IL6	1
BP	GO:0072540	T-helper 17 cell lineage commitment	2022-01-06	14/18862	0.00444573	0.0262533	0.00672575	IL6	1
BP	GO:0018209	peptidyl-serine modification	2022-02-06	333/18862	0.00444755	0.0262533	0.00672575	IL6/MIF	2
BP	GO:0007596	blood coagulation	2022-02-06	342/18862	0.00468556	0.0262533	0.00672575	IL6/SERPING1	2
BP	GO:0010713	negative regulation of collagen metabolic process	2022-01-06	15/18862	0.00476265	0.0262533	0.00672575	IL6	1
BP	GO:0043518	negative regulation of DNA damage response, signal transduction by p53 class mediator	2022-01-06	15/18862	0.00476265	0.0262533	0.00672575	MIF	1
BP	GO:0070207	protein homotrimerization	2022-01-06	15/18862	0.00476265	0.0262533	0.00672575	MIF	1
BP	GO:1902166	negative regulation of intrinsic apoptotic signaling pathway in response to DNA damage by p53 class mediator	2022-01-06	15/18862	0.00476265	0.0262533	0.00672575	MIF	1
BP	GO:1903799	negative regulation of production of miRNAs involved in gene silencing by miRNA	2022-01-06	15/18862	0.00476265	0.0262533	0.00672575	IL6	1
BP	GO:2000146	negative regulation of cell motility	2022-02-06	345/18862	0.00476621	0.0262533	0.00672575	DPP4/MIF	2
BP	GO:0007599	hemostasis	2022-02-06	346/18862	0.00479324	0.0262533	0.00672575	IL6/SERPING1	2
BP	GO:0050817	coagulation	2022-02-06	347/18862	0.00482034	0.0262533	0.00672575	IL6/SERPING1	2
BP	GO:0001666	response to hypoxia	2022-02-06	348/18862	0.00484751	0.0262533	0.00672575	DPP4/SLC6A4	2
BP	GO:0051271	negative regulation of cellular component movement	2022-02-06	352/18862	0.00495692	0.0262533	0.00672575	DPP4/MIF	2
BP	GO:0002830	positive regulation of type 2 immune response	2022-01-06	16/18862	0.00507949	0.0262533	0.00672575	IL6	1
BP	GO:0021924	cell proliferation in external granule layer	2022-01-06	16/18862	0.00507949	0.0262533	0.00672575	SLC6A4	1
BP	GO:0021930	cerebellar granule cell precursor proliferation	2022-01-06	16/18862	0.00507949	0.0262533	0.00672575	SLC6A4	1
BP	GO:0045779	negative regulation of bone resorption	2022-01-06	16/18862	0.00507949	0.0262533	0.00672575	IL6	1
BP	GO:0051709	regulation of killing of cells of other organism	2022-01-06	16/18862	0.00507949	0.0262533	0.00672575	PRF1	1
BP	GO:0009615	response to virus	2022-02-06	359/18862	0.00515118	0.0262533	0.00672575	IL6/PRF1	2
BP	GO:0036293	response to decreased oxygen levels	2022-02-06	360/18862	0.00517922	0.0262533	0.00672575	DPP4/SLC6A4	2
BP	GO:0007159	leukocyte cell-cell adhesion	2022-02-06	366/18862	0.00534897	0.0262533	0.00672575	DPP4/IL6	2
BP	GO:0009306	protein secretion	2022-02-06	367/18862	0.00537751	0.0262533	0.00672575	DPP4/IL6	2
BP	GO:0002295	T-helper cell lineage commitment	2022-01-06	17/18862	0.00539624	0.0262533	0.00672575	IL6	1
BP	GO:0021534	cell proliferation in hindbrain	2022-01-06	17/18862	0.00539624	0.0262533	0.00672575	SLC6A4	1
BP	GO:0033631	cell-cell adhesion mediated by integrin	2022-01-06	17/18862	0.00539624	0.0262533	0.00672575	DPP4	1
BP	GO:0070206	protein trimerization	2022-01-06	17/18862	0.00539624	0.0262533	0.00672575	MIF	1
BP	GO:0150078	positive regulation of neuroinflammatory response	2022-01-06	17/18862	0.00539624	0.0262533	0.00672575	IL6	1
BP	GO:1902165	regulation of intrinsic apoptotic signaling pathway in response to DNA damage by p53 class mediator	2022-01-06	17/18862	0.00539624	0.0262533	0.00672575	MIF	1
BP	GO:0035592	establishment of protein localization to extracellular region	2022-02-06	368/18862	0.00540613	0.0262533	0.00672575	DPP4/IL6	2
BP	GO:0018108	peptidyl-tyrosine phosphorylation	2022-02-06	369/18862	0.00543481	0.0262533	0.00672575	IL6/MIF	2
BP	GO:0018212	peptidyl-tyrosine modification	2022-02-06	372/18862	0.0055213	0.0262533	0.00672575	IL6/MIF	2
BP	GO:0071692	protein localization to extracellular region	2022-02-06	375/18862	0.00560844	0.0262533	0.00672575	DPP4/IL6	2
BP	GO:0040013	negative regulation of locomotion	2022-02-06	377/18862	0.00566688	0.0262533	0.00672575	DPP4/MIF	2
BP	GO:0007597	blood coagulation, intrinsic pathway	2022-01-06	18/18862	0.00571291	0.0262533	0.00672575	SERPING1	1
BP	GO:0032740	positive regulation of interleukin-17 production	2022-01-06	18/18862	0.00571291	0.0262533	0.00672575	IL6	1
BP	GO:0035743	CD4-positive, alpha-beta T cell cytokine production	2022-01-06	18/18862	0.00571291	0.0262533	0.00672575	IL6	1
BP	GO:0042136	neurotransmitter biosynthetic process	2022-01-06	18/18862	0.00571291	0.0262533	0.00672575	SLC6A4	1
BP	GO:0046851	negative regulation of bone remodeling	2022-01-06	18/18862	0.00571291	0.0262533	0.00672575	IL6	1
BP	GO:0060252	positive regulation of glial cell proliferation	2022-01-06	18/18862	0.00571291	0.0262533	0.00672575	IL6	1
BP	GO:0006959	humoral immune response	2022-02-06	380/18862	0.00575509	0.0262533	0.00672575	IL6/SERPING1	2
BP	GO:0070482	response to oxygen levels	2022-02-06	385/18862	0.00590353	0.0262533	0.00672575	DPP4/SLC6A4	2
BP	GO:0007620	copulation	2022-01-06	19/18862	0.0060295	0.0262533	0.00672575	SLC6A4	1
BP	GO:0035640	exploration behavior	2022-01-06	19/18862	0.0060295	0.0262533	0.00672575	DPP4	1
BP	GO:0030198	extracellular matrix organization	2022-02-06	393/18862	0.00614473	0.0262533	0.00672575	DPP4/IL6	2
BP	GO:0043062	extracellular structure organization	2022-02-06	394/18862	0.0061752	0.0262533	0.00672575	DPP4/IL6	2
BP	GO:0045787	positive regulation of cell cycle	2022-02-06	395/18862	0.00620574	0.0262533	0.00672575	MIF/SLC6A4	2
BP	GO:0045229	external encapsulating structure organization	2022-02-06	396/18862	0.00623635	0.0262533	0.00672575	DPP4/IL6	2
BP	GO:0002726	positive regulation of T cell cytokine production	2022-01-06	20/18862	0.006346	0.0262533	0.00672575	IL6	1
BP	GO:0006837	serotonin transport	2022-01-06	20/18862	0.006346	0.0262533	0.00672575	SLC6A4	1
BP	GO:0006925	inflammatory cell apoptotic process	2022-01-06	20/18862	0.006346	0.0262533	0.00672575	IL6	1
BP	GO:0034104	negative regulation of tissue remodeling	2022-01-06	20/18862	0.006346	0.0262533	0.00672575	IL6	1
BP	GO:0043373	CD4-positive, alpha-beta T cell lineage commitment	2022-01-06	20/18862	0.006346	0.0262533	0.00672575	IL6	1
BP	GO:1903978	regulation of microglial cell activation	2022-01-06	20/18862	0.006346	0.0262533	0.00672575	IL6	1
BP	GO:2000178	negative regulation of neural precursor cell proliferation	2022-01-06	20/18862	0.006346	0.0262533	0.00672575	SLC6A4	1
BP	GO:0002790	peptide secretion	2022-02-06	401/18862	0.00639047	0.0262575	0.00672681	DPP4/IL6	2
BP	GO:0002363	alpha-beta T cell lineage commitment	2022-01-06	21/18862	0.00666241	0.0264743	0.00678237	IL6	1
BP	GO:0060965	negative regulation of gene silencing by miRNA	2022-01-06	21/18862	0.00666241	0.0264743	0.00678237	IL6	1
BP	GO:0072574	hepatocyte proliferation	2022-01-06	21/18862	0.00666241	0.0264743	0.00678237	IL6	1
BP	GO:0072575	epithelial cell proliferation involved in liver morphogenesis	2022-01-06	21/18862	0.00666241	0.0264743	0.00678237	IL6	1
BP	GO:1902254	negative regulation of intrinsic apoptotic signaling pathway by p53 class mediator	2022-01-06	21/18862	0.00666241	0.0264743	0.00678237	MIF	1
BP	GO:0010888	negative regulation of lipid storage	2022-01-06	22/18862	0.00697875	0.0270203	0.00692224	IL6	1
BP	GO:0043369	CD4-positive or CD8-positive, alpha-beta T cell lineage commitment	2022-01-06	22/18862	0.00697875	0.0270203	0.00692224	IL6	1
BP	GO:0072576	liver morphogenesis	2022-01-06	22/18862	0.00697875	0.0270203	0.00692224	IL6	1
BP	GO:1904996	positive regulation of leukocyte adhesion to vascular endothelial cell	2022-01-06	22/18862	0.00697875	0.0270203	0.00692224	IL6	1
BP	GO:0045785	positive regulation of cell adhesion	2022-02-06	425/18862	0.00715478	0.0271986	0.00696793	DPP4/IL6	2
BP	GO:0010738	regulation of protein kinase A signaling	2022-01-06	23/18862	0.00729499	0.0271986	0.00696793	MIF	1
BP	GO:0060149	negative regulation of posttranscriptional gene silencing	2022-01-06	23/18862	0.00729499	0.0271986	0.00696793	IL6	1
BP	GO:0060967	negative regulation of gene silencing by RNA	2022-01-06	23/18862	0.00729499	0.0271986	0.00696793	IL6	1
BP	GO:0071157	negative regulation of cell cycle arrest	2022-01-06	23/18862	0.00729499	0.0271986	0.00696793	MIF	1
BP	GO:1903055	positive regulation of extracellular matrix organization	2022-01-06	23/18862	0.00729499	0.0271986	0.00696793	IL6	1
BP	GO:0001819	positive regulation of cytokine production	2022-02-06	437/18862	0.00755206	0.027202	0.0069688	IL6/MIF	2
BP	GO:0022407	regulation of cell-cell adhesion	2022-02-06	437/18862	0.00755206	0.027202	0.0069688	DPP4/IL6	2
BP	GO:0001963	synaptic transmission, dopaminergic	2022-01-06	24/18862	0.00761116	0.027202	0.0069688	SLC6A4	1
BP	GO:0002418	immune response to tumor cell	2022-01-06	24/18862	0.00761116	0.027202	0.0069688	PRF1	1
BP	GO:0006309	apoptotic DNA fragmentation	2022-01-06	24/18862	0.00761116	0.027202	0.0069688	IL6	1
BP	GO:0048710	regulation of astrocyte differentiation	2022-01-06	24/18862	0.00761116	0.027202	0.0069688	IL6	1
BP	GO:1900017	positive regulation of cytokine production involved in inflammatory response	2022-01-06	24/18862	0.00761116	0.027202	0.0069688	IL6	1
BP	GO:0032682	negative regulation of chemokine production	2022-01-06	25/18862	0.00792724	0.0276766	0.00709038	IL6	1
BP	GO:0042730	fibrinolysis	2022-01-06	25/18862	0.00792724	0.0276766	0.00709038	SERPING1	1
BP	GO:0048143	astrocyte activation	2022-01-06	25/18862	0.00792724	0.0276766	0.00709038	IL6	1
BP	GO:1903798	regulation of production of miRNAs involved in gene silencing by miRNA	2022-01-06	25/18862	0.00792724	0.0276766	0.00709038	IL6	1
BP	GO:0002313	mature B cell differentiation involved in immune response	2022-01-06	26/18862	0.00824324	0.0284509	0.00728876	IL6	1
BP	GO:0070920	regulation of production of small RNA involved in gene silencing by RNA	2022-01-06	26/18862	0.00824324	0.0284509	0.00728876	IL6	1
BP	GO:0002697	regulation of immune effector process	2022-02-06	465/18862	0.00851789	0.0288198	0.00738326	IL6/SERPING1	2
BP	GO:0002360	T cell lineage commitment	2022-01-06	27/18862	0.00855915	0.0288198	0.00738326	IL6	1
BP	GO:0002675	positive regulation of acute inflammatory response	2022-01-06	27/18862	0.00855915	0.0288198	0.00738326	IL6	1
BP	GO:0010758	regulation of macrophage chemotaxis	2022-01-06	27/18862	0.00855915	0.0288198	0.00738326	MIF	1
BP	GO:0042110	T cell activation	2022-02-06	474/18862	0.0088398	0.0288198	0.00738326	DPP4/IL6	2
BP	GO:0010575	positive regulation of vascular endothelial growth factor production	2022-01-06	28/18862	0.00887498	0.0288198	0.00738326	IL6	1
BP	GO:0033028	myeloid cell apoptotic process	2022-01-06	28/18862	0.00887498	0.0288198	0.00738326	IL6	1
BP	GO:0072376	protein activation cascade	2022-01-06	28/18862	0.00887498	0.0288198	0.00738326	SERPING1	1
BP	GO:0072378	blood coagulation, fibrin clot formation	2022-01-06	28/18862	0.00887498	0.0288198	0.00738326	SERPING1	1
BP	GO:0090344	negative regulation of cell aging	2022-01-06	28/18862	0.00887498	0.0288198	0.00738326	MIF	1
BP	GO:1902253	regulation of intrinsic apoptotic signaling pathway by p53 class mediator	2022-01-06	28/18862	0.00887498	0.0288198	0.00738326	MIF	1
BP	GO:0042133	neurotransmitter metabolic process	2022-01-06	29/18862	0.00919072	0.029224	0.0074868	SLC6A4	1
BP	GO:0072539	T-helper 17 cell differentiation	2022-01-06	29/18862	0.00919072	0.029224	0.0074868	IL6	1
BP	GO:2000637	positive regulation of gene silencing by miRNA	2022-01-06	29/18862	0.00919072	0.029224	0.0074868	IL6	1
BP	GO:0002828	regulation of type 2 immune response	2022-01-06	30/18862	0.00950639	0.029224	0.0074868	IL6	1
BP	GO:0060148	positive regulation of posttranscriptional gene silencing	2022-01-06	30/18862	0.00950639	0.029224	0.0074868	IL6	1
BP	GO:0070102	interleukin-6-mediated signaling pathway	2022-01-06	30/18862	0.00950639	0.029224	0.0074868	IL6	1
BP	GO:1902230	negative regulation of intrinsic apoptotic signaling pathway in response to DNA damage	2022-01-06	30/18862	0.00950639	0.029224	0.0074868	MIF	1
BP	GO:0002446	neutrophil mediated immunity	2022-02-06	499/18862	0.00976295	0.029224	0.0074868	IL6/MIF	2
BP	GO:0000737	DNA catabolic process, endonucleolytic	2022-01-06	31/18862	0.00982196	0.029224	0.0074868	IL6	1
BP	GO:0001516	prostaglandin biosynthetic process	2022-01-06	31/18862	0.00982196	0.029224	0.0074868	MIF	1
BP	GO:0002335	mature B cell differentiation	2022-01-06	31/18862	0.00982196	0.029224	0.0074868	IL6	1
BP	GO:0002347	response to tumor cell	2022-01-06	31/18862	0.00982196	0.029224	0.0074868	PRF1	1
BP	GO:0019835	cytolysis	2022-01-06	31/18862	0.00982196	0.029224	0.0074868	PRF1	1
BP	GO:0046457	prostanoid biosynthetic process	2022-01-06	31/18862	0.00982196	0.029224	0.0074868	MIF	1
BP	GO:0097421	liver regeneration	2022-01-06	31/18862	0.00982196	0.029224	0.0074868	IL6	1
BP	GO:0098810	neurotransmitter reuptake	2022-01-06	31/18862	0.00982196	0.029224	0.0074868	SLC6A4	1
BP	GO:1901797	negative regulation of signal transduction by p53 class mediator	2022-01-06	31/18862	0.00982196	0.029224	0.0074868	MIF	1
BP	GO:0090022	regulation of neutrophil chemotaxis	2022-01-06	32/18862	0.0101375	0.029922	0.00766561	DPP4	1
BP	GO:0001662	behavioral fear response	2022-01-06	33/18862	0.0104529	0.029922	0.00766561	DPP4	1
BP	GO:0002724	regulation of T cell cytokine production	2022-01-06	33/18862	0.0104529	0.029922	0.00766561	IL6	1
BP	GO:0030262	apoptotic nuclear changes	2022-01-06	33/18862	0.0104529	0.029922	0.00766561	IL6	1
BP	GO:0035633	maintenance of blood-brain barrier	2022-01-06	33/18862	0.0104529	0.029922	0.00766561	IL6	1
BP	GO:0060251	regulation of glial cell proliferation	2022-01-06	33/18862	0.0104529	0.029922	0.00766561	IL6	1
BP	GO:0070050	neuron cellular homeostasis	2022-01-06	33/18862	0.0104529	0.029922	0.00766561	IL6	1
BP	GO:0072538	T-helper 17 type immune response	2022-01-06	33/18862	0.0104529	0.029922	0.00766561	IL6	1
BP	GO:0002209	behavioral defense response	2022-01-06	34/18862	0.0107682	0.0305352	0.00782271	DPP4	1
BP	GO:0043516	regulation of DNA damage response, signal transduction by p53 class mediator	2022-01-06	34/18862	0.0107682	0.0305352	0.00782271	MIF	1
BP	GO:0006921	cellular component disassembly involved in execution phase of apoptosis	2022-01-06	35/18862	0.0110834	0.0311367	0.00797682	IL6	1
BP	GO:0048854	brain morphogenesis	2022-01-06	35/18862	0.0110834	0.0311367	0.00797682	SLC6A4	1
BP	GO:0002369	T cell cytokine production	2022-01-06	36/18862	0.0113986	0.0315814	0.00809075	IL6	1
BP	GO:0042092	type 2 immune response	2022-01-06	36/18862	0.0113986	0.0315814	0.00809075	IL6	1
BP	GO:0043368	positive T cell selection	2022-01-06	36/18862	0.0113986	0.0315814	0.00809075	IL6	1
BP	GO:0010737	protein kinase A signaling	2022-01-06	37/18862	0.0117137	0.0315851	0.00809168	MIF	1
BP	GO:0042596	fear response	2022-01-06	37/18862	0.0117137	0.0315851	0.00809168	DPP4	1
BP	GO:0046621	negative regulation of organ growth	2022-01-06	37/18862	0.0117137	0.0315851	0.00809168	SLC6A4	1
BP	GO:0060969	negative regulation of gene silencing	2022-01-06	37/18862	0.0117137	0.0315851	0.00809168	IL6	1
BP	GO:1902229	regulation of intrinsic apoptotic signaling pathway in response to DNA damage	2022-01-06	37/18862	0.0117137	0.0315851	0.00809168	MIF	1
BP	GO:1904994	regulation of leukocyte adhesion to vascular endothelial cell	2022-01-06	37/18862	0.0117137	0.0315851	0.00809168	IL6	1
BP	GO:0001504	neurotransmitter uptake	2022-01-06	38/18862	0.0120287	0.0318654	0.0081635	SLC6A4	1
BP	GO:0007618	mating	2022-01-06	38/18862	0.0120287	0.0318654	0.0081635	SLC6A4	1
BP	GO:0032733	positive regulation of interleukin-10 production	2022-01-06	38/18862	0.0120287	0.0318654	0.0081635	IL6	1
BP	GO:0048246	macrophage chemotaxis	2022-01-06	38/18862	0.0120287	0.0318654	0.0081635	MIF	1
BP	GO:0032660	regulation of interleukin-17 production	2022-01-06	39/18862	0.0123436	0.0324153	0.00830437	IL6	1
BP	GO:1905521	regulation of macrophage migration	2022-01-06	39/18862	0.0123436	0.0324153	0.00830437	MIF	1
BP	GO:0006308	DNA catabolic process	2022-01-06	40/18862	0.0126584	0.0326738	0.0083706	IL6	1
BP	GO:0030890	positive regulation of B cell proliferation	2022-01-06	40/18862	0.0126584	0.0326738	0.0083706	MIF	1
BP	GO:0150077	regulation of neuroinflammatory response	2022-01-06	40/18862	0.0126584	0.0326738	0.0083706	IL6	1
BP	GO:1904037	positive regulation of epithelial cell apoptotic process	2022-01-06	40/18862	0.0126584	0.0326738	0.0083706	IL6	1
BP	GO:0002251	organ or tissue specific immune response	2022-01-06	41/18862	0.0129731	0.0333437	0.00854222	IL6	1
BP	GO:0014002	astrocyte development	2022-01-06	42/18862	0.0132878	0.033722	0.00863912	IL6	1
BP	GO:0032965	regulation of collagen biosynthetic process	2022-01-06	42/18862	0.0132878	0.033722	0.00863912	IL6	1
BP	GO:1902622	regulation of neutrophil migration	2022-01-06	42/18862	0.0132878	0.033722	0.00863912	DPP4	1
BP	GO:0032620	interleukin-17 production	2022-01-06	43/18862	0.0136024	0.0343759	0.00880664	IL6	1
BP	GO:0002639	positive regulation of immunoglobulin production	2022-01-06	44/18862	0.0139169	0.0344499	0.00882562	IL6	1
BP	GO:0042771	intrinsic apoptotic signaling pathway in response to DNA damage by p53 class mediator	2022-01-06	44/18862	0.0139169	0.0344499	0.00882562	MIF	1
BP	GO:0045124	regulation of bone resorption	2022-01-06	44/18862	0.0139169	0.0344499	0.00882562	IL6	1
BP	GO:0046427	positive regulation of receptor signaling pathway via JAK-STAT	2022-01-06	44/18862	0.0139169	0.0344499	0.00882562	IL6	1
BP	GO:0150076	neuroinflammatory response	2022-01-06	44/18862	0.0139169	0.0344499	0.00882562	IL6	1
BP	GO:0031018	endocrine pancreas development	2022-01-06	45/18862	0.0142313	0.0350844	0.00898817	IL6	1
BP	GO:0006953	acute-phase response	2022-01-06	46/18862	0.0145456	0.0351153	0.00899607	IL6	1
BP	GO:0048146	positive regulation of fibroblast proliferation	2022-01-06	46/18862	0.0145456	0.0351153	0.00899607	MIF	1
BP	GO:0050919	negative chemotaxis	2022-01-06	46/18862	0.0145456	0.0351153	0.00899607	DPP4	1
BP	GO:0071354	cellular response to interleukin-6	2022-01-06	46/18862	0.0145456	0.0351153	0.00899607	IL6	1
BP	GO:0001774	microglial cell activation	2022-01-06	47/18862	0.0148598	0.0351153	0.00899607	IL6	1
BP	GO:0010712	regulation of collagen metabolic process	2022-01-06	47/18862	0.0148598	0.0351153	0.00899607	IL6	1
BP	GO:0035722	interleukin-12-mediated signaling pathway	2022-01-06	47/18862	0.0148598	0.0351153	0.00899607	MIF	1
BP	GO:0001913	T cell mediated cytotoxicity	2022-01-06	48/18862	0.015174	0.0351153	0.00899607	PRF1	1
BP	GO:0002673	regulation of acute inflammatory response	2022-01-06	48/18862	0.015174	0.0351153	0.00899607	IL6	1
BP	GO:0006692	prostanoid metabolic process	2022-01-06	48/18862	0.015174	0.0351153	0.00899607	MIF	1
BP	GO:0006693	prostaglandin metabolic process	2022-01-06	48/18862	0.015174	0.0351153	0.00899607	MIF	1
BP	GO:0014009	glial cell proliferation	2022-01-06	48/18862	0.015174	0.0351153	0.00899607	IL6	1
BP	GO:0030195	negative regulation of blood coagulation	2022-01-06	48/18862	0.015174	0.0351153	0.00899607	SERPING1	1
BP	GO:0033628	regulation of cell adhesion mediated by integrin	2022-01-06	48/18862	0.015174	0.0351153	0.00899607	DPP4	1
BP	GO:0045058	T cell selection	2022-01-06	48/18862	0.015174	0.0351153	0.00899607	IL6	1
BP	GO:1904894	positive regulation of receptor signaling pathway via STAT	2022-01-06	48/18862	0.015174	0.0351153	0.00899607	IL6	1
BP	GO:0071349	cellular response to interleukin-12	2022-01-06	49/18862	0.0154881	0.0354348	0.00907793	MIF	1
BP	GO:0071622	regulation of granulocyte chemotaxis	2022-01-06	49/18862	0.0154881	0.0354348	0.00907793	DPP4	1
BP	GO:1900047	negative regulation of hemostasis	2022-01-06	49/18862	0.0154881	0.0354348	0.00907793	SERPING1	1
BP	GO:0035176	social behavior	2022-01-06	50/18862	0.015802	0.0357469	0.0091579	SLC6A4	1
BP	GO:0070671	response to interleukin-12	2022-01-06	50/18862	0.015802	0.0357469	0.0091579	MIF	1
BP	GO:0070741	response to interleukin-6	2022-01-06	50/18862	0.015802	0.0357469	0.0091579	IL6	1
BP	GO:0006636	unsaturated fatty acid biosynthetic process	2022-01-06	51/18862	0.0161159	0.0359189	0.00920196	MIF	1
BP	GO:0010718	positive regulation of epithelial to mesenchymal transition	2022-01-06	51/18862	0.0161159	0.0359189	0.00920196	IL6	1
BP	GO:0032964	collagen biosynthetic process	2022-01-06	51/18862	0.0161159	0.0359189	0.00920196	IL6	1
BP	GO:0046850	regulation of bone remodeling	2022-01-06	51/18862	0.0161159	0.0359189	0.00920196	IL6	1
BP	GO:0002711	positive regulation of T cell mediated immunity	2022-01-06	52/18862	0.0164298	0.0360857	0.00924469	IL6	1
BP	GO:0035196	production of miRNAs involved in gene silencing by miRNA	2022-01-06	52/18862	0.0164298	0.0360857	0.00924469	IL6	1
BP	GO:0050819	negative regulation of coagulation	2022-01-06	52/18862	0.0164298	0.0360857	0.00924469	SERPING1	1
BP	GO:0051703	biological process involved in intraspecies interaction between organisms	2022-01-06	52/18862	0.0164298	0.0360857	0.00924469	SLC6A4	1
BP	GO:0002720	positive regulation of cytokine production involved in immune response	2022-01-06	53/18862	0.0167435	0.036378	0.00931956	IL6	1
BP	GO:0045599	negative regulation of fat cell differentiation	2022-01-06	53/18862	0.0167435	0.036378	0.00931956	IL6	1
BP	GO:1905517	macrophage migration	2022-01-06	53/18862	0.0167435	0.036378	0.00931956	MIF	1
BP	GO:0006968	cellular defense response	2022-01-06	54/18862	0.0170572	0.0367947	0.00942633	PRF1	1
BP	GO:0061756	leukocyte adhesion to vascular endothelial cell	2022-01-06	54/18862	0.0170572	0.0367947	0.00942633	IL6	1
BP	GO:0010883	regulation of lipid storage	2022-01-06	56/18862	0.0176842	0.0374781	0.00960141	IL6	1
BP	GO:0031050	dsRNA processing	2022-01-06	56/18862	0.0176842	0.0374781	0.00960141	IL6	1
BP	GO:0032731	positive regulation of interleukin-1 beta production	2022-01-06	56/18862	0.0176842	0.0374781	0.00960141	IL6	1
BP	GO:0046456	icosanoid biosynthetic process	2022-01-06	56/18862	0.0176842	0.0374781	0.00960141	MIF	1
BP	GO:0070918	production of small RNA involved in gene silencing by RNA	2022-01-06	56/18862	0.0176842	0.0374781	0.00960141	IL6	1
BP	GO:0031295	T cell costimulation	2022-01-06	57/18862	0.0179976	0.0378765	0.00970347	DPP4	1
BP	GO:0032757	positive regulation of interleukin-8 production	2022-01-06	57/18862	0.0179976	0.0378765	0.00970347	IL6	1
BP	GO:0010574	regulation of vascular endothelial growth factor production	2022-01-06	58/18862	0.018311	0.0384021	0.00983812	IL6	1
BP	GO:0031294	lymphocyte costimulation	2022-01-06	59/18862	0.0186242	0.0389239	0.00997179	DPP4	1
BP	GO:0032653	regulation of interleukin-10 production	2022-01-06	60/18862	0.0189373	0.0391718	0.0100353	IL6	1
BP	GO:0032722	positive regulation of chemokine production	2022-01-06	60/18862	0.0189373	0.0391718	0.0100353	IL6	1
BP	GO:0090342	regulation of cell aging	2022-01-06	60/18862	0.0189373	0.0391718	0.0100353	MIF	1
BP	GO:0030888	regulation of B cell proliferation	2022-01-06	61/18862	0.0192504	0.0396835	0.0101664	MIF	1
BP	GO:0010573	vascular endothelial growth factor production	2022-01-06	62/18862	0.0195634	0.0399199	0.010227	IL6	1
BP	GO:0032613	interleukin-10 production	2022-01-06	62/18862	0.0195634	0.0399199	0.010227	IL6	1
BP	GO:0045453	bone resorption	2022-01-06	62/18862	0.0195634	0.0399199	0.010227	IL6	1
BP	GO:0014015	positive regulation of gliogenesis	2022-01-06	63/18862	0.0198763	0.0401515	0.0102863	IL6	1
BP	GO:0031343	positive regulation of cell killing	2022-01-06	63/18862	0.0198763	0.0401515	0.0102863	PRF1	1
BP	GO:0045665	negative regulation of neuron differentiation	2022-01-06	63/18862	0.0198763	0.0401515	0.0102863	SLC6A4	1
BP	GO:0032732	positive regulation of interleukin-1 production	2022-01-06	64/18862	0.0201891	0.0403783	0.0103444	IL6	1
BP	GO:0042093	T-helper cell differentiation	2022-01-06	64/18862	0.0201891	0.0403783	0.0103444	IL6	1
BP	GO:0071300	cellular response to retinoic acid	2022-01-06	64/18862	0.0201891	0.0403783	0.0103444	SLC6A4	1
BP	GO:0045824	negative regulation of innate immune response	2022-01-06	65/18862	0.0205019	0.0405104	0.0103782	SERPING1	1
BP	GO:0002294	CD4-positive, alpha-beta T cell differentiation involved in immune response	2022-01-06	66/18862	0.0208145	0.0405104	0.0103782	IL6	1
BP	GO:0030193	regulation of blood coagulation	2022-01-06	66/18862	0.0208145	0.0405104	0.0103782	SERPING1	1
BP	GO:0050805	negative regulation of synaptic transmission	2022-01-06	66/18862	0.0208145	0.0405104	0.0103782	SLC6A4	1
BP	GO:0002287	alpha-beta T cell activation involved in immune response	2022-01-06	67/18862	0.0211271	0.0405104	0.0103782	IL6	1
BP	GO:0002293	alpha-beta T cell differentiation involved in immune response	2022-01-06	67/18862	0.0211271	0.0405104	0.0103782	IL6	1
BP	GO:0002637	regulation of immunoglobulin production	2022-01-06	67/18862	0.0211271	0.0405104	0.0103782	IL6	1
BP	GO:0031640	killing of cells of other organism	2022-01-06	67/18862	0.0211271	0.0405104	0.0103782	PRF1	1
BP	GO:0033555	multicellular organismal response to stress	2022-01-06	67/18862	0.0211271	0.0405104	0.0103782	DPP4	1
BP	GO:0045669	positive regulation of osteoblast differentiation	2022-01-06	67/18862	0.0211271	0.0405104	0.0103782	IL6	1
BP	GO:0050918	positive chemotaxis	2022-01-06	67/18862	0.0211271	0.0405104	0.0103782	MIF	1
BP	GO:1900046	regulation of hemostasis	2022-01-06	67/18862	0.0211271	0.0405104	0.0103782	SERPING1	1
BP	GO:1905953	negative regulation of lipid localization	2022-01-06	67/18862	0.0211271	0.0405104	0.0103782	IL6	1
BP	GO:0002548	monocyte chemotaxis	2022-01-06	68/18862	0.0214396	0.0407217	0.0104324	IL6	1
BP	GO:0045685	regulation of glial cell differentiation	2022-01-06	68/18862	0.0214396	0.0407217	0.0104324	IL6	1
BP	GO:1900015	regulation of cytokine production involved in inflammatory response	2022-01-06	68/18862	0.0214396	0.0407217	0.0104324	IL6	1
BP	GO:0002534	cytokine production involved in inflammatory response	2022-01-06	69/18862	0.021752	0.040929	0.0104855	IL6	1
BP	GO:0014823	response to activity	2022-01-06	69/18862	0.021752	0.040929	0.0104855	IL6	1
BP	GO:0042531	positive regulation of tyrosine phosphorylation of STAT protein	2022-01-06	69/18862	0.021752	0.040929	0.0104855	IL6	1
BP	GO:0050818	regulation of coagulation	2022-01-06	71/18862	0.0223766	0.0418435	0.0107197	SERPING1	1
BP	GO:0098586	cellular response to virus	2022-01-06	71/18862	0.0223766	0.0418435	0.0107197	IL6	1
BP	GO:0033627	cell adhesion mediated by integrin	2022-01-06	72/18862	0.0226887	0.0421661	0.0108024	DPP4	1
BP	GO:0048708	astrocyte differentiation	2022-01-06	72/18862	0.0226887	0.0421661	0.0108024	IL6	1
BP	GO:0002292	T cell differentiation involved in immune response	2022-01-06	73/18862	0.0230008	0.0423551	0.0108508	IL6	1
BP	GO:0031016	pancreas development	2022-01-06	73/18862	0.0230008	0.0423551	0.0108508	IL6	1
BP	GO:0031100	animal organ regeneration	2022-01-06	73/18862	0.0230008	0.0423551	0.0108508	IL6	1
BP	GO:0061045	negative regulation of wound healing	2022-01-06	74/18862	0.0233128	0.0427991	0.0109646	SERPING1	1
BP	GO:0072332	intrinsic apoptotic signaling pathway by p53 class mediator	2022-01-06	75/18862	0.0236247	0.0432403	0.0110776	MIF	1
BP	GO:0001960	negative regulation of cytokine-mediated signaling pathway	2022-01-06	76/18862	0.0239365	0.0436787	0.0111899	IL6	1
BP	GO:0002709	regulation of T cell mediated immunity	2022-01-06	78/18862	0.0245599	0.0445768	0.01142	IL6	1
BP	GO:0001776	leukocyte homeostasis	2022-01-06	79/18862	0.0248715	0.0445768	0.01142	IL6	1
BP	GO:0002312	B cell activation involved in immune response	2022-01-06	79/18862	0.0248715	0.0445768	0.01142	IL6	1
BP	GO:0015844	monoamine transport	2022-01-06	79/18862	0.0248715	0.0445768	0.01142	SLC6A4	1
BP	GO:0042310	vasoconstriction	2022-01-06	79/18862	0.0248715	0.0445768	0.01142	SLC6A4	1
BP	GO:0048145	regulation of fibroblast proliferation	2022-01-06	79/18862	0.0248715	0.0445768	0.01142	MIF	1
BP	GO:0009988	cell-cell recognition	2022-01-06	80/18862	0.025183	0.0448688	0.0114948	PRF1	1
BP	GO:0048144	fibroblast proliferation	2022-01-06	80/18862	0.025183	0.0448688	0.0114948	MIF	1
BP	GO:0043367	CD4-positive, alpha-beta T cell differentiation	2022-01-06	81/18862	0.0254944	0.0451572	0.0115687	IL6	1
BP	GO:0060761	negative regulation of response to cytokine stimulus	2022-01-06	81/18862	0.0254944	0.0451572	0.0115687	IL6	1
BP	GO:2000177	regulation of neural precursor cell proliferation	2022-01-06	82/18862	0.0258057	0.0454421	0.0116417	SLC6A4	1
BP	GO:2001021	negative regulation of response to DNA damage stimulus	2022-01-06	82/18862	0.0258057	0.0454421	0.0116417	MIF	1
BP	GO:0002718	regulation of cytokine production involved in immune response	2022-01-06	84/18862	0.0264281	0.0464029	0.0118878	IL6	1
BP	GO:0019915	lipid storage	2022-01-06	85/18862	0.0267392	0.0465432	0.0119237	IL6	1
BP	GO:0042509	regulation of tyrosine phosphorylation of STAT protein	2022-01-06	85/18862	0.0267392	0.0465432	0.0119237	IL6	1
BP	GO:0050829	defense response to Gram-negative bacterium	2022-01-06	85/18862	0.0267392	0.0465432	0.0119237	IL6	1
BP	GO:0032755	positive regulation of interleukin-6 production	2022-01-06	86/18862	0.0270502	0.0468147	0.0119933	IL6	1
BP	GO:0034103	regulation of tissue remodeling	2022-01-06	86/18862	0.0270502	0.0468147	0.0119933	IL6	1
BP	GO:0002532	production of molecular mediator involved in inflammatory response	2022-01-06	88/18862	0.0276719	0.0476178	0.0121991	IL6	1
BP	GO:0007260	tyrosine phosphorylation of STAT protein	2022-01-06	88/18862	0.0276719	0.0476178	0.0121991	IL6	1
BP	GO:0032642	regulation of chemokine production	2022-01-06	89/18862	0.0279827	0.0478797	0.0122662	IL6	1
BP	GO:0046849	bone remodeling	2022-01-06	89/18862	0.0279827	0.0478797	0.0122662	IL6	1
BP	GO:0070301	cellular response to hydrogen peroxide	2022-01-06	90/18862	0.0282934	0.0481385	0.0123325	IL6	1
BP	GO:1903035	negative regulation of response to wounding	2022-01-06	90/18862	0.0282934	0.0481385	0.0123325	SERPING1	1
BP	GO:0002690	positive regulation of leukocyte chemotaxis	2022-01-06	91/18862	0.0286039	0.0485303	0.0124328	IL6	1
BP	GO:0002367	cytokine production involved in immune response	2022-01-06	93/18862	0.0292248	0.0493067	0.0126317	IL6	1
BP	GO:0014013	regulation of gliogenesis	2022-01-06	93/18862	0.0292248	0.0493067	0.0126317	IL6	1
BP	GO:0097194	execution phase of apoptosis	2022-01-06	94/18862	0.0295352	0.0495535	0.0126949	IL6	1
BP	GO:1904035	regulation of epithelial cell apoptotic process	2022-01-06	94/18862	0.0295352	0.0495535	0.0126949	IL6	1
BP	GO:0032602	chemokine production	2022-01-06	95/18862	0.0298454	0.0497974	0.0127574	IL6	1
BP	GO:2001243	negative regulation of intrinsic apoptotic signaling pathway	2022-01-06	95/18862	0.0298454	0.0497974	0.0127574	MIF	1
BP	GO:0042100	B cell proliferation	2022-01-06	96/18862	0.0301556	0.0500384	0.0128192	MIF	1
BP	GO:0048661	positive regulation of smooth muscle cell proliferation	2022-01-06	96/18862	0.0301556	0.0500384	0.0128192	IL6	1
BP	GO:0032677	regulation of interleukin-8 production	2022-01-06	97/18862	0.0304657	0.0504145	0.0129155	IL6	1
BP	GO:0031341	regulation of cell killing	2022-01-06	98/18862	0.0307757	0.0506499	0.0129758	PRF1	1
BP	GO:0050830	defense response to Gram-positive bacterium	2022-01-06	98/18862	0.0307757	0.0506499	0.0129758	IL6	1
BP	GO:0002702	positive regulation of production of molecular mediator of immune response	2022-01-06	99/18862	0.0310856	0.0507028	0.0129894	IL6	1
BP	GO:0002824	positive regulation of adaptive immune response based on somatic recombination of immune receptors built from immunoglobulin superfamily domains	2022-01-06	99/18862	0.0310856	0.0507028	0.0129894	IL6	1
BP	GO:0042102	positive regulation of T cell proliferation	2022-01-06	99/18862	0.0310856	0.0507028	0.0129894	IL6	1
BP	GO:0002832	negative regulation of response to biotic stimulus	2022-01-06	100/18862	0.0313954	0.0507028	0.0129894	SERPING1	1
BP	GO:0008630	intrinsic apoptotic signaling pathway in response to DNA damage	2022-01-06	100/18862	0.0313954	0.0507028	0.0129894	MIF	1
BP	GO:0010717	regulation of epithelial to mesenchymal transition	2022-01-06	100/18862	0.0313954	0.0507028	0.0129894	IL6	1
BP	GO:0035710	CD4-positive, alpha-beta T cell activation	2022-01-06	100/18862	0.0313954	0.0507028	0.0129894	IL6	1
BP	GO:0046425	regulation of receptor signaling pathway via JAK-STAT	2022-01-06	101/18862	0.0317052	0.0510665	0.0130826	IL6	1
BP	GO:0046620	regulation of organ growth	2022-01-06	102/18862	0.0320149	0.0511099	0.0130937	SLC6A4	1
BP	GO:0071887	leukocyte apoptotic process	2022-01-06	102/18862	0.0320149	0.0511099	0.0130937	IL6	1
BP	GO:0030593	neutrophil chemotaxis	2022-01-06	103/18862	0.0323245	0.0511099	0.0130937	DPP4	1
BP	GO:0032526	response to retinoic acid	2022-01-06	103/18862	0.0323245	0.0511099	0.0130937	SLC6A4	1
BP	GO:0032637	interleukin-8 production	2022-01-06	103/18862	0.0323245	0.0511099	0.0130937	IL6	1
BP	GO:0032651	regulation of interleukin-1 beta production	2022-01-06	103/18862	0.0323245	0.0511099	0.0130937	IL6	1
BP	GO:0070498	interleukin-1-mediated signaling pathway	2022-01-06	103/18862	0.0323245	0.0511099	0.0130937	IL6	1
BP	GO:0002821	positive regulation of adaptive immune response	2022-01-06	104/18862	0.032634	0.0514645	0.0131845	IL6	1
BP	GO:0030330	DNA damage response, signal transduction by p53 class mediator	2022-01-06	106/18862	0.0332527	0.052246	0.0133847	MIF	1
BP	GO:0002526	acute inflammatory response	2022-01-06	107/18862	0.033562	0.052246	0.0133847	IL6	1
BP	GO:0007613	memory	2022-01-06	107/18862	0.033562	0.052246	0.0133847	SLC6A4	1
BP	GO:0046632	alpha-beta T cell differentiation	2022-01-06	107/18862	0.033562	0.052246	0.0133847	IL6	1
BP	GO:0048640	negative regulation of developmental growth	2022-01-06	107/18862	0.033562	0.052246	0.0133847	SLC6A4	1
BP	GO:0002708	positive regulation of lymphocyte mediated immunity	2022-01-06	108/18862	0.0338712	0.0523227	0.0134044	IL6	1
BP	GO:0032611	interleukin-1 beta production	2022-01-06	108/18862	0.0338712	0.0523227	0.0134044	IL6	1
BP	GO:0071156	regulation of cell cycle arrest	2022-01-06	108/18862	0.0338712	0.0523227	0.0134044	MIF	1
BP	GO:0032963	collagen metabolic process	2022-01-06	109/18862	0.0341803	0.0526655	0.0134922	IL6	1
BP	GO:1904892	regulation of receptor signaling pathway via STAT	2022-01-06	110/18862	0.0344893	0.0530064	0.0135796	IL6	1
BP	GO:0002286	T cell activation involved in immune response	2022-01-06	111/18862	0.0347982	0.0532104	0.0136318	IL6	1
BP	GO:0022612	gland morphogenesis	2022-01-06	111/18862	0.0347982	0.0532104	0.0136318	IL6	1
BP	GO:0021782	glial cell development	2022-01-06	112/18862	0.0351071	0.0535471	0.0137181	IL6	1
BP	GO:0001909	leukocyte mediated cytotoxicity	2022-01-06	113/18862	0.0354158	0.053882	0.0138039	PRF1	1
BP	GO:0007569	cell aging	2022-01-06	115/18862	0.0360331	0.05441	0.0139391	MIF	1
BP	GO:0030449	regulation of complement activation	2022-01-06	115/18862	0.0360331	0.05441	0.0139391	SERPING1	1
BP	GO:0033559	unsaturated fatty acid metabolic process	2022-01-06	115/18862	0.0360331	0.05441	0.0139391	MIF	1
BP	GO:1904019	epithelial cell apoptotic process	2022-01-06	116/18862	0.0363416	0.054739	0.0140234	IL6	1
BP	GO:0032652	regulation of interleukin-1 production	2022-01-06	119/18862	0.0372667	0.0559928	0.0143446	IL6	1
BP	GO:0060964	regulation of gene silencing by miRNA	2022-01-06	121/18862	0.037883	0.0567775	0.0145456	IL6	1
BP	GO:0035270	endocrine system development	2022-01-06	122/18862	0.038191	0.0570975	0.0146276	IL6	1
BP	GO:0006690	icosanoid metabolic process	2022-01-06	123/18862	0.038499	0.0571336	0.0146369	MIF	1
BP	GO:0035821	modulation of process of other organism	2022-01-06	123/18862	0.038499	0.0571336	0.0146369	PRF1	1
BP	GO:1990266	neutrophil migration	2022-01-06	123/18862	0.038499	0.0571336	0.0146369	DPP4	1
BP	GO:0060147	regulation of posttranscriptional gene silencing	2022-01-06	124/18862	0.0388068	0.0572039	0.0146549	IL6	1
BP	GO:0071621	granulocyte chemotaxis	2022-01-06	124/18862	0.0388068	0.0572039	0.0146549	DPP4	1
BP	GO:0002698	negative regulation of immune effector process	2022-01-06	125/18862	0.0391146	0.0572039	0.0146549	SERPING1	1
BP	GO:0002705	positive regulation of leukocyte mediated immunity	2022-01-06	125/18862	0.0391146	0.0572039	0.0146549	IL6	1
BP	GO:0032355	response to estradiol	2022-01-06	125/18862	0.0391146	0.0572039	0.0146549	SLC6A4	1
BP	GO:0060966	regulation of gene silencing by RNA	2022-01-06	125/18862	0.0391146	0.0572039	0.0146549	IL6	1
BP	GO:0032612	interleukin-1 production	2022-01-06	126/18862	0.0394223	0.0575147	0.0147345	IL6	1
BP	GO:0035296	regulation of tube diameter	2022-01-06	127/18862	0.0397299	0.0576848	0.0147781	SLC6A4	1
BP	GO:0097746	blood vessel diameter maintenance	2022-01-06	127/18862	0.0397299	0.0576848	0.0147781	SLC6A4	1
BP	GO:0002576	platelet degranulation	2022-01-06	128/18862	0.0400374	0.0577151	0.0147858	SERPING1	1
BP	GO:0035150	regulation of tube size	2022-01-06	128/18862	0.0400374	0.0577151	0.0147858	SLC6A4	1
BP	GO:0045667	regulation of osteoblast differentiation	2022-01-06	128/18862	0.0400374	0.0577151	0.0147858	IL6	1
BP	GO:0046683	response to organophosphorus	2022-01-06	130/18862	0.0406523	0.0584618	0.0149772	SLC6A4	1
BP	GO:0042770	signal transduction in response to DNA damage	2022-01-06	131/18862	0.0409596	0.0586246	0.0150188	MIF	1
BP	GO:0061041	regulation of wound healing	2022-01-06	131/18862	0.0409596	0.0586246	0.0150188	SERPING1	1
BP	GO:0002687	positive regulation of leukocyte migration	2022-01-06	133/18862	0.0415739	0.0589451	0.015101	IL6	1
BP	GO:0045727	positive regulation of translation	2022-01-06	133/18862	0.0415739	0.0589451	0.015101	IL6	1
BP	GO:0050729	positive regulation of inflammatory response	2022-01-06	133/18862	0.0415739	0.0589451	0.015101	IL6	1
BP	GO:0050768	negative regulation of neurogenesis	2022-01-06	133/18862	0.0415739	0.0589451	0.015101	IL6	1
BP	GO:0042542	response to hydrogen peroxide	2022-01-06	135/18862	0.0421879	0.0595362	0.0152524	IL6	1
BP	GO:0051384	response to glucocorticoid	2022-01-06	135/18862	0.0421879	0.0595362	0.0152524	IL6	1
BP	GO:0045598	regulation of fat cell differentiation	2022-01-06	136/18862	0.0424948	0.0598294	0.0153275	IL6	1
BP	GO:0030183	B cell differentiation	2022-01-06	137/18862	0.0428015	0.059994	0.0153697	IL6	1
BP	GO:0001889	liver development	2022-01-06	138/18862	0.0431083	0.059994	0.0153697	IL6	1
BP	GO:0002920	regulation of humoral immune response	2022-01-06	138/18862	0.0431083	0.059994	0.0153697	SERPING1	1
BP	GO:0051961	negative regulation of nervous system development	2022-01-06	138/18862	0.0431083	0.059994	0.0153697	IL6	1
BP	GO:0061351	neural precursor cell proliferation	2022-01-06	138/18862	0.0431083	0.059994	0.0153697	SLC6A4	1
BP	GO:0030902	hindbrain development	2022-01-06	139/18862	0.0434149	0.0601436	0.015408	SLC6A4	1
BP	GO:0050921	positive regulation of chemotaxis	2022-01-06	139/18862	0.0434149	0.0601436	0.015408	IL6	1
BP	GO:0046718	viral entry into host cell	2022-01-06	140/18862	0.0437214	0.0602917	0.0154459	DPP4	1
BP	GO:0061008	hepaticobiliary system development	2022-01-06	140/18862	0.0437214	0.0602917	0.0154459	IL6	1
BP	GO:0006958	complement activation, classical pathway	2022-01-06	141/18862	0.0440279	0.060576	0.0155188	SERPING1	1
BP	GO:0014074	response to purine-containing compound	2022-01-06	144/18862	0.0449468	0.0615598	0.0157708	SLC6A4	1
BP	GO:0060968	regulation of gene silencing	2022-01-06	144/18862	0.0449468	0.0615598	0.0157708	IL6	1
BP	GO:0002262	myeloid cell homeostasis	2022-01-06	145/18862	0.045253	0.0618389	0.0158423	IL6	1
BP	GO:0002700	regulation of production of molecular mediator of immune response	2022-01-06	146/18862	0.045559	0.0621166	0.0159134	IL6	1
BP	GO:0097530	granulocyte migration	2022-01-06	148/18862	0.0461709	0.062809	0.0160908	DPP4	1
BP	GO:0046631	alpha-beta T cell activation	2022-01-06	149/18862	0.0464767	0.063083	0.016161	IL6	1
BP	GO:0050777	negative regulation of immune response	2022-01-06	150/18862	0.0467824	0.0633556	0.0162309	SERPING1	1
BP	GO:0031960	response to corticosteroid	2022-01-06	152/18862	0.0473936	0.0640397	0.0164061	IL6	1
BP	GO:0001837	epithelial to mesenchymal transition	2022-01-06	153/18862	0.0476991	0.0641654	0.0164383	IL6	1
BP	GO:0044409	entry into host	2022-01-06	153/18862	0.0476991	0.0641654	0.0164383	DPP4	1
BP	GO:0002822	regulation of adaptive immune response based on somatic recombination of immune receptors built from immunoglobulin superfamily domains	2022-01-06	155/18862	0.0483099	0.0648426	0.0166118	IL6	1
BP	GO:0002455	humoral immune response mediated by circulating immunoglobulin	2022-01-06	156/18862	0.0486151	0.0651076	0.0166797	SERPING1	1
BP	GO:0002706	regulation of lymphocyte mediated immunity	2022-01-06	157/18862	0.0489203	0.065227	0.0167103	IL6	1
BP	GO:0030168	platelet activation	2022-01-06	157/18862	0.0489203	0.065227	0.0167103	IL6	1
BP	GO:0032675	regulation of interleukin-6 production	2022-01-06	158/18862	0.0492253	0.0654892	0.0167775	IL6	1
BP	GO:0034614	cellular response to reactive oxygen species	2022-01-06	159/18862	0.0495303	0.0657502	0.0168443	IL6	1
BP	GO:0048660	regulation of smooth muscle cell proliferation	2022-01-06	160/18862	0.0498352	0.0658654	0.0168738	IL6	1
BP	GO:2001242	regulation of intrinsic apoptotic signaling pathway	2022-01-06	160/18862	0.0498352	0.0658654	0.0168738	MIF	1
CC	GO:0034774	secretory granule lumen	2022-02-06	322/19520	0.00389459	0.0306886	0.0153018	MIF/SERPING1	2
CC	GO:0045121	membrane raft	2022-02-06	323/19520	0.00391831	0.0306886	0.0153018	DPP4/SLC6A4	2
CC	GO:0098857	membrane microdomain	2022-02-06	323/19520	0.00391831	0.0306886	0.0153018	DPP4/SLC6A4	2
CC	GO:0060205	cytoplasmic vesicle lumen	2022-02-06	326/19520	0.00398991	0.0306886	0.0153018	MIF/SERPING1	2
CC	GO:0031983	vesicle lumen	2022-02-06	328/19520	0.00403798	0.0306886	0.0153018	MIF/SERPING1	2
CC	GO:0005925	focal adhesion	2022-02-06	416/19520	0.00642127	0.0320346	0.0159729	DPP4/SLC6A4	2
CC	GO:0030055	cell-substrate junction	2022-02-06	423/19520	0.00663305	0.0320346	0.0159729	DPP4/SLC6A4	2
CC	GO:0031258	lamellipodium membrane	2022-01-06	22/19520	0.00674413	0.0320346	0.0159729	DPP4	1
CC	GO:0031904	endosome lumen	2022-01-06	35/19520	0.0107115	0.0452261	0.0225504	PRF1	1
CC	GO:0099056	integral component of presynaptic membrane	2022-01-06	56/19520	0.0170923	0.0646663	0.0322436	SLC6A4	1
CC	GO:0098889	intrinsic component of presynaptic membrane	2022-01-06	64/19520	0.0195141	0.0646663	0.0322436	SLC6A4	1
CC	GO:0031093	platelet alpha granule lumen	2022-01-06	67/19520	0.0204209	0.0646663	0.0322436	SERPING1	1
CC	GO:0031091	platelet alpha granule	2022-01-06	91/19520	0.0276508	0.0806808	0.0402287	SERPING1	1
CC	GO:0099055	integral component of postsynaptic membrane	2022-01-06	100/19520	0.0303506	0.0806808	0.0402287	SLC6A4	1
CC	GO:0098936	intrinsic component of postsynaptic membrane	2022-01-06	105/19520	0.0318477	0.0806808	0.0402287	SLC6A4	1
CC	GO:1904813	ficolin-1-rich granule lumen	2022-01-06	124/19520	0.0375193	0.0836983	0.0417332	MIF	1
CC	GO:0099699	integral component of synaptic membrane	2022-01-06	128/19520	0.0387098	0.0836983	0.0417332	SLC6A4	1
CC	GO:0042734	presynaptic membrane	2022-01-06	137/19520	0.0413839	0.0836983	0.0417332	SLC6A4	1
CC	GO:0099240	intrinsic component of synaptic membrane	2022-01-06	140/19520	0.0422739	0.0836983	0.0417332	SLC6A4	1
CC	GO:0072562	blood microparticle	2022-01-06	146/19520	0.0440518	0.0836983	0.0417332	SERPING1	1
MF	GO:0048018	receptor ligand activity	2022-03-06	486/18337	0.000348637	0.010121	0.0038049	DPP4/IL6/MIF	3
MF	GO:0030546	signaling receptor activator activity	2022-03-06	492/18337	0.000361466	0.010121	0.0038049	DPP4/IL6/MIF	3
MF	GO:0005125	cytokine activity	2022-02-06	235/18337	0.00237129	0.0232797	0.00875175	IL6/MIF	2
MF	GO:0005126	cytokine receptor binding	2022-02-06	270/18337	0.00311597	0.0232797	0.00875175	IL6/MIF	2
MF	GO:0008239	dipeptidyl-peptidase activity	2022-01-06	10/18337	0.00326806	0.0232797	0.00875175	DPP4	1
MF	GO:0015378	sodium:chloride symporter activity	2022-01-06	11/18337	0.00359438	0.0232797	0.00875175	SLC6A4	1
MF	GO:0043176	amine binding	2022-01-06	12/18337	0.0039206	0.0232797	0.00875175	SLC6A4	1
MF	GO:0051378	serotonin binding	2022-01-06	12/18337	0.0039206	0.0232797	0.00875175	SLC6A4	1
MF	GO:0015373	anion:sodium symporter activity	2022-01-06	14/18337	0.00457279	0.0232797	0.00875175	SLC6A4	1
MF	GO:0016863	intramolecular oxidoreductase activity, transposing C=C bonds	2022-01-06	14/18337	0.00457279	0.0232797	0.00875175	MIF	1
MF	GO:0050998	nitric-oxide synthase binding	2022-01-06	14/18337	0.00457279	0.0232797	0.00875175	SLC6A4	1
MF	GO:0015377	cation:chloride symporter activity	2022-01-06	17/18337	0.0055504	0.0259019	0.00973755	SLC6A4	1
MF	GO:0005326	neurotransmitter transmembrane transporter activity	2022-01-06	19/18337	0.0062017	0.026715	0.0100432	SLC6A4	1
MF	GO:0015296	anion:cation symporter activity	2022-01-06	22/18337	0.00717798	0.0287119	0.010794	SLC6A4	1
MF	GO:0017075	syntaxin-1 binding	2022-01-06	26/18337	0.00847844	0.0308117	0.0115833	SLC6A4	1
MF	GO:0045499	chemorepellent activity	2022-01-06	27/18337	0.00880334	0.0308117	0.0115833	DPP4	1
MF	GO:0022829	wide pore channel activity	2022-01-06	30/18337	0.00977748	0.0322082	0.0121083	PRF1	1
MF	GO:0042056	chemoattractant activity	2022-01-06	37/18337	0.0120474	0.0374173	0.0140666	MIF	1
MF	GO:0004177	aminopeptidase activity	2022-01-06	39/18337	0.0126951	0.0374173	0.0140666	DPP4	1
MF	GO:1901618	organic hydroxy compound transmembrane transporter activity	2022-01-06	49/18337	0.0159286	0.0433372	0.0162922	SLC6A4	1
MF	GO:0016860	intramolecular oxidoreductase activity	2022-01-06	50/18337	0.0162514	0.0433372	0.0162922	MIF	1
MF	GO:0008144	drug binding	2022-01-06	61/18337	0.0197971	0.0503925	0.0189446	SLC6A4	1
MF	GO:0015370	solute:sodium symporter activity	2022-01-06	72/18337	0.023332	0.0537068	0.0201905	SLC6A4	1
MF	GO:0001618	virus receptor activity	2022-01-06	76/18337	0.0246148	0.0537068	0.0201905	DPP4	1
MF	GO:0019905	syntaxin binding	2022-01-06	77/18337	0.0249353	0.0537068	0.0201905	SLC6A4	1
MF	GO:0140272	exogenous protein binding	2022-01-06	77/18337	0.0249353	0.0537068	0.0201905	DPP4	1
MF	GO:0008238	exopeptidase activity	2022-01-06	95/18337	0.030689	0.0608544	0.0228776	DPP4	1
MF	GO:0004867	serine-type endopeptidase inhibitor activity	2022-01-06	98/18337	0.0316452	0.0608544	0.0228776	SERPING1	1
MF	GO:0015294	solute:cation symporter activity	2022-01-06	99/18337	0.0319637	0.0608544	0.0228776	SLC6A4	1
MF	GO:0015108	chloride transmembrane transporter activity	2022-01-06	101/18337	0.0326006	0.0608544	0.0228776	SLC6A4	1
MF	GO:0000149	SNARE binding	2022-01-06	114/18337	0.0367316	0.0663538	0.0249451	SLC6A4	1
MF	GO:0002020	protease binding	2022-01-06	131/18337	0.0421115	0.0728586	0.0273904	DPP4	1
MF	GO:0070851	growth factor receptor binding	2022-01-06	141/18337	0.0452644	0.0728586	0.0273904	IL6	1
MF	GO:0015293	symporter activity	2022-01-06	143/18337	0.045894	0.0728586	0.0273904	SLC6A4	1
MF	GO:0015103	inorganic anion transmembrane transporter activity	2022-01-06	145/18337	0.0465232	0.0728586	0.0273904	SLC6A4	1
MF	GO:0015081	sodium ion transmembrane transporter activity	2022-01-06	146/18337	0.0468376	0.0728586	0.0273904	SLC6A4	1
